# Supplementary material
Source: PubMed Central journal article supplement (PMC8429514)
Supplement: NIHMS1694170-supplement-1.pdf [file NIHMS1694170-supplement-1.pdf]

**Supplementary Figure 1:** Flow diagram of the progress from screening for eligibility to final GWAS analysis sample

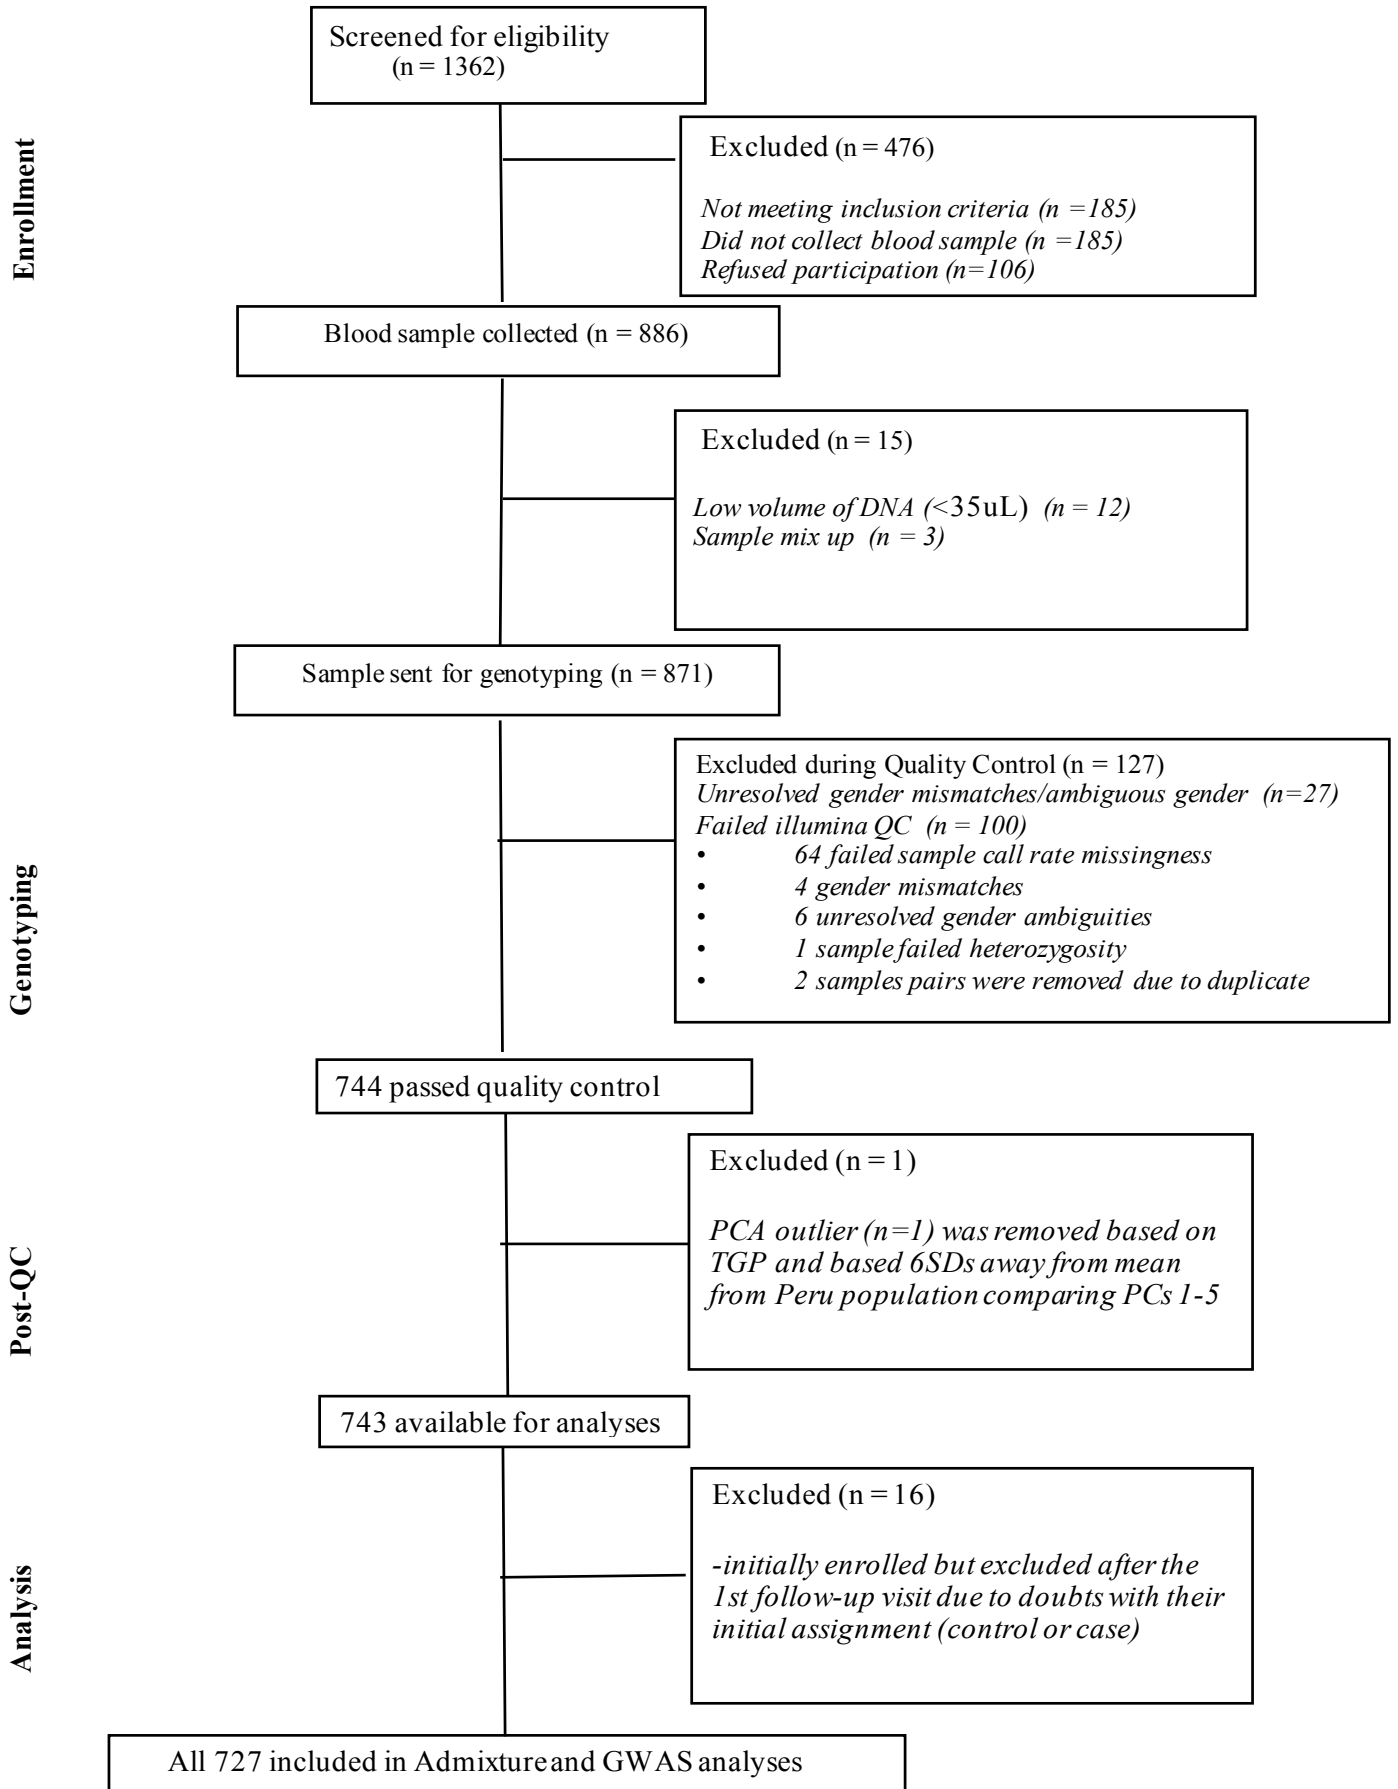

**Supplemental Figure 2:** Genomewide QQ plot for asthma, Log10[IgE], and lung function. Plots A,B and C are of those variants present in the the Genomewide Manhattan plots illustrated in **Figure 2**. Panel D is for Log10[IgE] excluding the 35,569 variants mapping to the HLA locus in **Figure 3**. The lambda value represents the inflation factor for each phenotype.

**[A] Asthma**

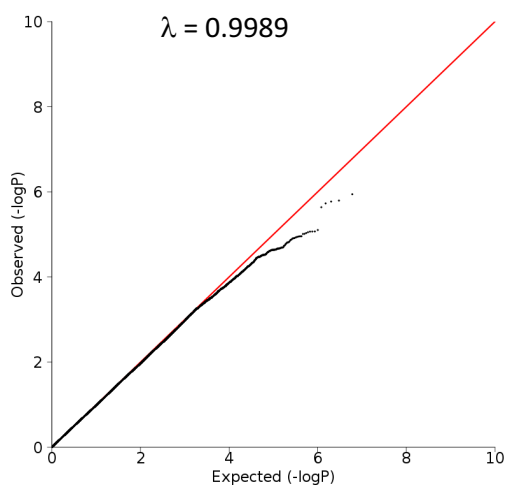

**[B] Log10[IgE]**

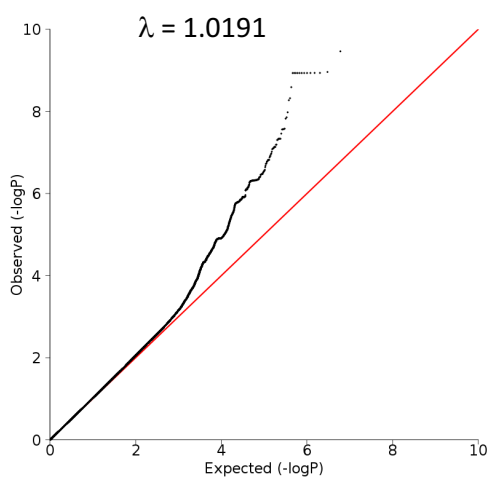

**[C] Lung Function**

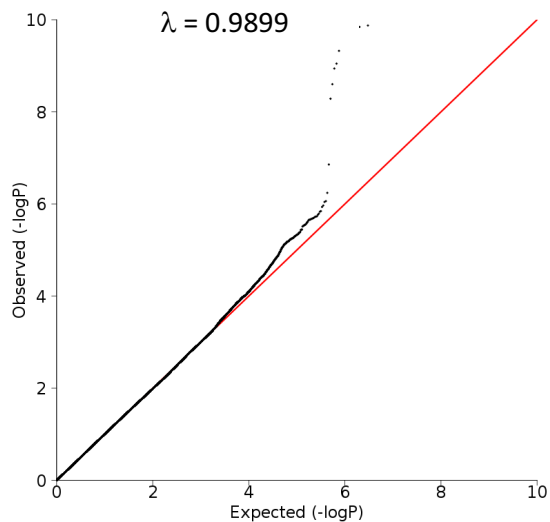

**[D] Log10[IgE] excluding HLA locus**

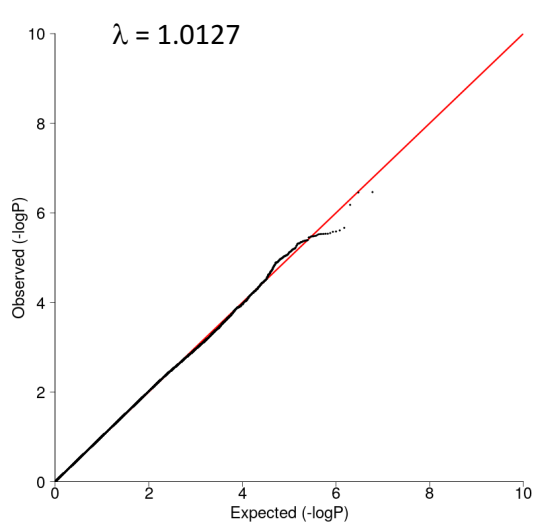

**Supplementary Figure 3: Colocalization of GWAS SNPs within  $\pm 1$ Mb region of rs4410198 with cis eQTLs of CTD-253719.5 lincRNA gene in lung tissue.** X-axis of the plots represent the genomic region on chr19. Top panel shows the GWAS association p-values for the SNPs within  $\pm 1$ Mb region of the peak SNP. Middle panel shows the p-values for cis eQTL association with CTD-253719.5 gene in lung tissue. Bottom panel shows the posterior probabilities for each variant and cis eQTL pair in the region. P-values are plotted on  $-\log_{10}$  scale and posterior probabilities are on original scale. Posterior probabilities for the gene and top colocalizing SNP are given in table.

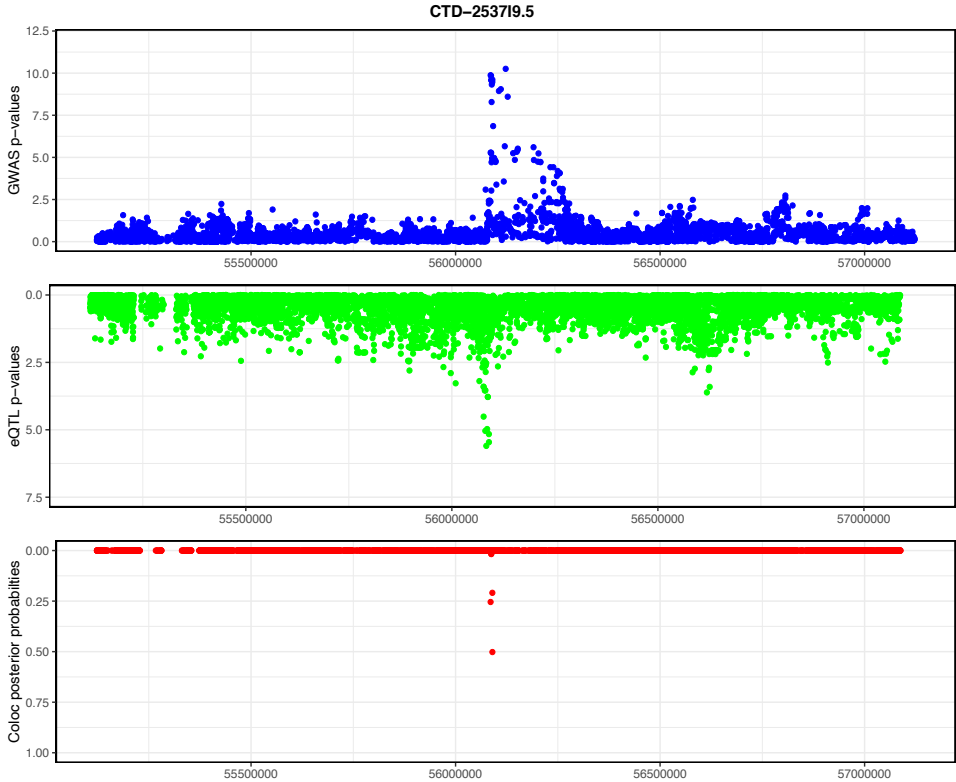

|      |              |     |
|------|--------------|-----|
| Gene | CTD-253719.5 | 98% |
| SNP  | rs34164618   | 50% |

**Supplementary Table 1:** Association between global genetic ancestry and the odds of asthma.

| ANCESTRY                  | BOTH SITES                        |                | PAMPAS                            |                | VILLA                             |                |
|---------------------------|-----------------------------------|----------------|-----------------------------------|----------------|-----------------------------------|----------------|
|                           | Odds Ratio [Confidence intervals] | <i>P</i> value | Odds Ratio [Confidence intervals] | <i>P</i> value | Odds Ratio [Confidence intervals] | <i>P</i> value |
| Indigenous (NAT) ancestry | 0.987 [0.972:1.00]                | 0.12           | 0.991 [0.969:1.013]               | 0.43           | 0.981 [0.958:1.004]               | 0.11           |
| European (IBS) ancestry   | 1.013 [0.997:1.029]               | 0.12           | 1.009 [0.987:1.032]               | 0.43           | 1.019 [0.995:1.044]               | 0.11           |

Models included covariate for age, gender, socioeconomic status, and BMI  
 Site' was included as a covariate in the model combining both sites

**Supplementary Table 2: Association between global genetic ancestry and IgE and Lung Function**

| ANCESTRY                                          |                      | ALL SUBJECTS             |         | ASTHMA CASES             |         | CONTROLS                 |         |
|---------------------------------------------------|----------------------|--------------------------|---------|--------------------------|---------|--------------------------|---------|
|                                                   |                      | Effect, $\beta$ (95% CI) | P value | Effect, $\beta$ (95% CI) | P value | Effect, $\beta$ (95% CI) | P value |
| <i>Immunoglobulin E (mg/dl)</i>                   |                      |                          |         |                          |         |                          |         |
| Indigenous (NAT) ancestry                         | Log10(IgE)           | .010 [.004 : .015]       | <0.001  | .009 [.003:.015]         | 0.004   | .011 [.002:.020]         | 0.017   |
| Europeam (IBS) ancestry                           |                      | -.010 [-.004 : -.015]    | <0.001  | -.009 [-.003:-.015]      | 0.004   | -.011 [-.002:-.020]      | 0.017   |
| <i>Forced Expiratory Volume in 1 second, FEV1</i> |                      |                          |         |                          |         |                          |         |
| Indigenous (NAT) ancestry                         | Percent predicted, % | .192 [.082:.303]         | 0.001   | .111 [-.036:.258]        | 0.140   | .272 [.109:.436]         | 0.001   |
|                                                   | Z-score              | .017 [.007 : .026]       | 0.001   | .0095 [-.003 : .022]     | 0.140   | .024 [.010 : .038]       | 0.001   |
| Europeam (IBS) ancestry                           | Percent predicted, % | -.192 [-.303 : -.082]    | 0.001   | -.111 [-.258 : .036]     | 0.140   | -.272 [-.436 : -.109]    | 0.001   |
|                                                   | Z-score              | -.017 [-.026 : -.007]    | 0.001   | -.0095 [-.022 : .003]    | 0.140   | -.024 [-.038 : -.010]    | 0.001   |

IgE was log-transformed using the log10(IgE), and results are presented on the Log10 scale.

IgE model adjusted for age, gender, socioeconomic status, and site; BMI and height (z-score model) were added to the lung function models.

Asthma was included in the model combining both cases and controls.

Both sites were combined as direction of effect similar for both sites.

**Supplementary Table 3: SNPs passing the suggestive threshold ( $p < e-05$ ) for any of the three phenotypes of asthma, IgE and lung function.**

| rsID        | chr | hg19 position | REF/ALT         | MAF   | Nearby gene(s) | Asthma     |          | Log10(IgE)  |          | Lung Function |          |
|-------------|-----|---------------|-----------------|-------|----------------|------------|----------|-------------|----------|---------------|----------|
|             |     |               |                 |       |                | OR         | P value  | Effect Size | P value  | Effect Size   | P value  |
| rs1294042   | 1   | 9366485       | C/T             | 0.587 | SPSB1          | 0.88958519 | 0.3306   | -0.171      | 4.86E-06 | 0.177         | 0.8278   |
|             | 1   | 9366981       | CTT/C           | 0.512 |                | 0.83110428 | 0.149    | -0.203      | 3.44E-07 | 0.276         | 0.7504   |
|             | 1   | 9366987       | TTC/T           | 0.512 |                | 0.83110428 | 0.1498   | -0.203      | 3.50E-07 | 0.278         | 0.7487   |
| rs9308445   | 1   | 9385040       | A/T             | 0.720 | SPSB1          | 1.00803209 | 0.9501   | 0.19        | 4.19E-06 | -0.046        | 0.959    |
| rs9725969   | 1   | 9386384       | G/A             | 0.662 | SPSB1          | 0.9540874  | 0.7021   | 0.179       | 2.16E-06 | -0.472        | 0.5673   |
| rs1569422   | 1   | 9387444       | C/T             | 0.662 | SPSB1          | 0.95886978 | 0.7301   | 0.175       | 3.32E-06 | -0.427        | 0.602    |
|             | 1   | 9390616       | TG/T            | 0.659 |                | 0.94270677 | 0.6177   | 0.166       | 6.26E-06 | -0.384        | 0.631    |
| rs478103    | 1   | 9402403       | T/C             | 0.579 | SPSB1          | 0.85555919 | 0.1633   | 0.155       | 9.31E-06 | 0.055         | 0.9422   |
| rs644728    | 1   | 9403303       | A/G             | 0.578 | SPSB1          | 0.85214379 | 0.1522   | 0.155       | 8.91E-06 | 0.054         | 0.9429   |
| rs544264    | 1   | 9405017       | A/G             | 0.572 | SPSB1          | 0.87459006 | 0.233    | 0.16        | 4.46E-06 | -0.114        | 0.8804   |
| rs12044405  | 1   | 15311594      | T/G             | 0.073 | KAZN           | 0.62625352 | 0.1241   | 0.443       | 2.65E-06 | 0.688         | 0.7373   |
| rs4912145   | 1   | 20023833      | C/T             | 0.427 | TMCO4          | 0.60896164 | 8.86E-06 | -0.064      | 0.07213  | 0.533         | 0.4846   |
| rs10218471  | 1   | 48565408      | T/A             | 0.052 |                | 1.65698552 | 0.05495  | -0.02       | 0.8096   | 7.62          | 9.84E-06 |
|             | 1   | 163230460     | GAAAAAA/GAAAAAA | 0.250 |                | 1.92129608 | 2.30E-06 | -0.023      | 0.5991   | -1.167        | 0.2191   |
| rs2254220   | 1   | 232683525     | G/T             | 0.798 | SIPA1L2        | 0.91759423 | 0.5397   | -0.195      | 6.99E-06 | 1.402         | 0.1366   |
| rs61995744  | 2   | 133542574     | C/T             | 0.265 | NCKAP5         | 0.86156911 | 0.2244   | -0.168      | 9.83E-06 | 0.165         | 0.842    |
| rs1367392   | 2   | 133548150     | T/C             | 0.265 | NCKAP5         | 0.86329398 | 0.232    | -0.17       | 8.55E-06 | 0.147         | 0.8589   |
|             | 2   | 133549610     | C/CTGTTTGT      | 0.264 |                | 0.8641577  | 0.2344   | -0.171      | 7.83E-06 | 0.11          | 0.8945   |
| rs77294363  | 2   | 133551939     | C/T             | 0.265 | NCKAP5         | 0.86329398 | 0.2317   | -0.171      | 7.53E-06 | 0.159         | 0.8477   |
| rs140591884 | 2   | 133551987     | A/C             | 0.265 | NCKAP5         | 0.86329398 | 0.2318   | -0.171      | 7.52E-06 | 0.159         | 0.8479   |
| rs139877707 | 2   | 133553260     | C/T             | 0.265 | NCKAP5         | 0.86329398 | 0.2319   | -0.172      | 7.35E-06 | 0.167         | 0.8409   |
| rs78230170  | 2   | 133553307     | A/G             | 0.265 | NCKAP5         | 0.86329398 | 0.2315   | -0.172      | 7.21E-06 | 0.166         | 0.8412   |
| rs72847221  | 2   | 133553436     | C/G             | 0.265 | NCKAP5         | 0.86329398 | 0.2331   | -0.172      | 7.04E-06 | 0.168         | 0.8399   |
| rs4143563   | 2   | 133554475     | C/T             | 0.264 | NCKAP5         | 0.86070798 | 0.223    | -0.175      | 4.86E-06 | 0.152         | 0.8551   |
| rs4143564   | 2   | 133554670     | C/A             | 0.264 | NCKAP5         | 0.86070798 | 0.2233   | -0.175      | 4.76E-06 | 0.154         | 0.8526   |
| rs72847224  | 2   | 133554892     | G/A             | 0.264 | NCKAP5         | 0.86070798 | 0.2231   | -0.175      | 4.77E-06 | 0.155         | 0.8517   |
| rs7591491   | 2   | 133555827     | T/C             | 0.264 | NCKAP5         | 0.86070798 | 0.2231   | -0.175      | 4.67E-06 | 0.159         | 0.8481   |
| rs76778571  | 2   | 133556082     | C/G             | 0.265 | NCKAP5         | 0.86329398 | 0.2325   | -0.173      | 6.65E-06 | 0.179         | 0.8294   |
| rs72847226  | 2   | 133556485     | A/G             | 0.265 | NCKAP5         | 0.86329398 | 0.2327   | -0.173      | 6.57E-06 | 0.181         | 0.828    |
| rs1447558   | 2   | 133556541     | G/C             | 0.265 | NCKAP5         | 0.86329398 | 0.2323   | -0.173      | 6.55E-06 | 0.181         | 0.8279   |
| rs72847229  | 2   | 133557618     | T/C             | 0.265 | NCKAP5         | 0.86329398 | 0.2329   | -0.173      | 6.37E-06 | 0.185         | 0.8237   |
| rs72847230  | 2   | 133557666     | A/G             | 0.265 | NCKAP5         | 0.86329398 | 0.2329   | -0.173      | 6.35E-06 | 0.186         | 0.823    |
| rs12613421  | 2   | 133558909     | T/C             | 0.266 | NCKAP5         | 0.85641518 | 0.2087   | -0.176      | 4.34E-06 | 0.132         | 0.8735   |
| rs12614121  | 2   | 133559197     | T/G             | 0.266 | NCKAP5         | 0.85641518 | 0.209    | -0.176      | 4.28E-06 | 0.134         | 0.8721   |
| rs12614193  | 2   | 133559450     | T/C             | 0.266 | NCKAP5         | 0.85641518 | 0.2093   | -0.176      | 4.26E-06 | 0.135         | 0.8709   |
| rs10460263  | 2   | 133569446     | A/T             | 0.265 | NCKAP5         | 0.85898828 | 0.2193   | -0.178      | 3.43E-06 | 0.248         | 0.7665   |
| rs2100130   | 2   | 133569752     | C/T             | 0.267 | NCKAP5         | 0.85812972 | 0.2163   | -0.179      | 2.93E-06 | 0.306         | 0.7136   |
| rs72847242  | 2   | 133570153     | A/G             | 0.270 | NCKAP5         | 0.85470406 | 0.2041   | -0.18       | 2.97E-06 | 0.305         | 0.7159   |
| rs12618525  | 2   | 133572214     | G/C             | 0.268 | NCKAP5         | 0.85727202 | 0.213    | -0.176      | 4.49E-06 | 0.282         | 0.7351   |
| rs72847244  | 2   | 133573219     | T/C             | 0.268 | NCKAP5         | 0.85555919 | 0.2069   | -0.178      | 3.35E-06 | 0.268         | 0.747    |
| rs12621316  | 2   | 133575460     | G/C             | 0.268 | NCKAP5         | 0.85641518 | 0.2083   | -0.178      | 3.28E-06 | 0.282         | 0.7346   |
| rs72847246  | 2   | 133575991     | G/A             | 0.268 | NCKAP5         | 0.85898828 | 0.217    | -0.178      | 3.10E-06 | 0.276         | 0.7391   |
| rs72847247  | 2   | 133576495     | T/G             | 0.268 | NCKAP5         | 0.85898828 | 0.2153   | -0.176      | 4.17E-06 | 0.298         | 0.7191   |
|             | 2   | 133577808     | G/GT            | 0.268 |                | 0.84874202 | 0.1846   | -0.175      | 4.90E-06 | 0.326         | 0.6953   |
| rs11692657  | 2   | 133584061     | T/C             | 0.266 | NCKAP5         | 0.85129207 | 0.1854   | -0.178      | 2.60E-06 | 0.258         | 0.753    |
| rs1374740   | 2   | 133584471     | G/A             | 0.266 | NCKAP5         | 0.85470406 | 0.1958   | -0.178      | 2.47E-06 | 0.25          | 0.7608   |
| rs1374739   | 2   | 133584722     | G/C             | 0.265 | NCKAP5         | 0.86156911 | 0.221    | -0.176      | 3.52E-06 | 0.243         | 0.7677   |
| rs72847250  | 2   | 133588001     | C/T             | 0.265 | NCKAP5         | 0.85470406 | 0.2001   | -0.177      | 2.95E-06 | 0.203         | 0.8054   |
| rs16842050  | 2   | 133588278     | G/T             | 0.265 | NCKAP5         | 0.85384978 | 0.1954   | -0.177      | 3.01E-06 | 0.217         | 0.7924   |
| rs72847253  | 2   | 133595764     | G/A             | 0.265 | NCKAP5         | 0.83694242 | 0.1455   | -0.174      | 4.49E-06 | 0.175         | 0.832    |
| rs72847255  | 2   | 133598337     | C/T             | 0.265 | NCKAP5         | 0.83443536 | 0.14     | -0.175      | 4.06E-06 | 0.163         | 0.8438   |
|             | 2   | 133599210     | G/GT            | 0.265 |                | 0.83443536 | 0.1397   | -0.175      | 4.12E-06 | 0.161         | 0.8453   |
| rs72847259  | 2   | 133606478     | T/A             | 0.265 | NCKAP5         | 0.83360134 | 0.1386   | -0.172      | 6.25E-06 | 0.15          | 0.856    |
| rs72847260  | 2   | 133606628     | A/G             | 0.265 | NCKAP5         | 0.83276816 | 0.1372   | -0.173      | 5.97E-06 | 0.146         | 0.8604   |
| rs16842561  | 2   | 133612527     | A/G             | 0.261 | NCKAP5         | 0.82036985 | 0.1085   | -0.17       | 9.16E-06 | -0.019        | 0.9814   |
| rs1155819   | 2   | 133614059     | T/A             | 0.261 | NCKAP5         | 0.81791243 | 0.1035   | -0.17       | 9.12E-06 | -0.03         | 0.9714   |
| rs2044566   | 2   | 133631505     | G/C             | 0.263 | NCKAP5         | 0.8057353  | 0.08038  | -0.17       | 9.38E-06 | -0.112        | 0.8929   |
| rs72850141  | 2   | 133634550     | A/C             | 0.260 | NCKAP5         | 0.81058425 | 0.09007  | -0.171      | 9.24E-06 | -0.173        | 0.8359   |
| rs74617496  | 3   | 48768680      | C/T             | 0.144 |                | 0.49907445 | 9.76E-06 | -0.004      | 0.9289   | 2.31          | 0.03087  |

| rsID        | chr | hg19 position | REF/ALT     | MAF   | Nearby gene(s) | Asthma     |          | Log10(IgE)  |          | Lung Function |          |
|-------------|-----|---------------|-------------|-------|----------------|------------|----------|-------------|----------|---------------|----------|
|             |     |               |             |       |                | OR         | P value  | Effect Size | P value  | Effect Size   | P value  |
| rs39697     | 3   | 134711547     | C/G         | 0.290 | EPHB1          | 1.88702214 | 1.87E-06 | 0.008       | 0.8566   | -0.024        | 0.9789   |
|             | 5   | 71258619      | TA/T        | 0.489 |                | 1.01714532 | 0.8906   | -0.013      | 0.7482   | -3.844        | 3.08E-06 |
| rs7736434   | 5   | 141423997     | T/A         | 0.252 |                | 1.05022035 | 0.7294   | 0.068       | 0.1235   | -4.205        | 7.37E-06 |
| rs11747857  | 5   | 141426179     | C/T         | 0.252 |                | 1.04602786 | 0.7457   | 0.067       | 0.1244   | -4.148        | 8.05E-06 |
| rs192232327 | 5   | 141444488     | C/T         | 0.134 |                | 0.98412732 | 0.9245   | 0.072       | 0.1908   | -5.616        | 1.43E-06 |
| rs252152    | 5   | 141445774     | A/G         | 0.401 |                | 0.87197023 | 0.2335   | 0.065       | 0.07235  | -3.4          | 8.97E-06 |
| rs17208656  | 5   | 141446511     | G/C         | 0.235 |                | 1.04707441 | 0.7254   | 0.085       | 0.03909  | -3.917        | 7.91E-06 |
|             | 5   | 141447229     | CT/C        | 0.256 |                | 1.06289891 | 0.6492   | 0.087       | 0.04185  | -4.021        | 8.40E-06 |
| rs56372641  | 5   | 141448359     | G/C         | 0.237 |                | 1.04602786 | 0.7315   | 0.085       | 0.03921  | -3.928        | 7.48E-06 |
|             | 5   | 141459200     | AT/A        | 0.234 |                | 1.059715   | 0.6624   | 0.081       | 0.055    | -4.085        | 4.48E-06 |
| rs6580219   | 5   | 141463510     | G/A         | 0.727 |                | 0.95122942 | 0.6921   | -0.093      | 0.01938  | 3.953         | 2.83E-06 |
| rs891984    | 5   | 141465403     | T/A         | 0.679 |                | 0.99401796 | 0.9625   | -0.127      | 0.00172  | 4.008         | 2.96E-06 |
| rs17287162  | 5   | 141465680     | A/G         | 0.225 |                | 1.11071061 | 0.4459   | 0.069       | 0.1144   | -4.256        | 3.59E-06 |
| rs12655443  | 5   | 141467856     | C/A         | 0.275 |                | 1.01816298 | 0.8895   | 0.109       | 0.007126 | -4.163        | 1.16E-06 |
| rs1821263   | 5   | 141468254     | T/C         | 0.724 |                | 1.02020134 | 0.8771   | -0.124      | 0.002027 | 3.875         | 5.80E-06 |
| rs9324864   | 5   | 141469000     | C/T         | 0.414 |                | 0.89852567 | 0.3546   | 0.082       | 0.02351  | -3.412        | 8.75E-06 |
| rs28372841  | 5   | 141487979     | T/C         | 0.217 |                | 1.12749685 | 0.3779   | 0.05        | 0.2438   | -4.107        | 6.61E-06 |
| rs3761759   | 5   | 141488364     | G/C         | 0.217 | NDFIP1         | 1.12749685 | 0.3777   | 0.05        | 0.2437   | -4.108        | 6.61E-06 |
| rs55865281  | 5   | 141488807     | G/A         | 0.217 | NDFIP1         | 1.12749685 | 0.3777   | 0.05        | 0.2433   | -4.109        | 6.60E-06 |
| rs72799903  | 5   | 141492061     | G/A         | 0.217 | NDFIP1         | 1.11293425 | 0.4356   | 0.049       | 0.2591   | -4.099        | 7.15E-06 |
| rs185431275 | 5   | 141521867     | A/G         | 0.128 | NDFIP1         | 1.06183655 | 0.7373   | 0.043       | 0.4501   | -5.338        | 7.61E-06 |
| rs381084    | 5   | 145250340     | T/G         | 0.771 | GRXCR2         | 1.06929548 | 0.6246   | -0.191      | 8.27E-06 | 0.657         | 0.4801   |
| rs4960182   | 6   | 6276429       | C/T         | 0.583 | F13A1          | 1.7559324  | 1.14E-06 | -0.052      | 0.164    | -0.713        | 0.3699   |
| rs4959376   | 6   | 6276609       | A/G         | 0.586 | F13A1          | 1.74019991 | 1.69E-06 | -0.046      | 0.2159   | -0.776        | 0.3288   |
|             | 6   | 25755788      | CA/C        | 0.243 |                | 1.05654061 | 0.6822   | 0.184       | 9.78E-06 | -0.687        | 0.4472   |
| rs9295669   | 6   | 25758212      | C/T         | 0.728 | SLC17A4        | 1.03977048 | 0.7651   | -0.201      | 6.63E-07 | 1.475         | 0.0932   |
| rs9368714   | 6   | 32297341      | G/A         | 0.464 | C6orf10        | 0.91210515 | 0.4121   | -0.187      | 7.31E-08 | 1.378         | 0.06963  |
| rs9268301   | 6   | 32319637      | G/A         | 0.464 | C6orf10        | 0.91210515 | 0.4121   | -0.187      | 7.31E-08 | 1.378         | 0.06963  |
| rs3763313   | 6   | 32376471      | A/C         | 0.243 |                | 1.05442965 | 0.682    | 0.179       | 9.89E-06 | -0.74         | 0.3991   |
| rs9268505   | 6   | 32377408      | T/C         | 0.268 |                | 0.97921896 | 0.8685   | 0.211       | 6.44E-08 | -0.869        | 0.3081   |
| rs9268505   | 6   | 32377408      | T/C         | 0.268 |                | 0.97921896 | 0.8685   | 0.211       | 6.44E-08 | -0.869        | 0.3081   |
| rs28732205  | 6   | 32377712      | C/T         | 0.231 |                | 1.00702456 | 0.9603   | 0.187       | 6.14E-06 | -0.962        | 0.2831   |
|             | 6   | 32378746      | T/TTG       | 0.265 |                | 0.98019867 | 0.8751   | 0.211       | 8.34E-08 | -0.846        | 0.3253   |
| rs3129962   | 6   | 32379383      | G/C         | 0.231 |                | 1.002002   | 0.9903   | 0.186       | 7.34E-06 | -0.897        | 0.3174   |
| rs17208902  | 6   | 32379547      | C/T         | 0.231 |                | 1.002002   | 0.9903   | 0.186       | 7.34E-06 | -0.897        | 0.3174   |
| rs9469108   | 6   | 32380892      | C/T         | 0.228 |                | 1.02634095 | 0.8471   | 0.189       | 5.29E-06 | -0.999        | 0.2659   |
|             | 6   | 32382272      | A/AAAAGAAGG | 0.421 |                | 0.82036985 | 0.09283  | 0.187       | 3.03E-07 | -0.935        | 0.2399   |
| rs9268528   | 6   | 32383108      | A/G         | 0.550 |                | 1.09965886 | 0.4052   | -0.187      | 1.32E-07 | 0.898         | 0.2448   |
| rs9268542   | 6   | 32384721      | A/G         | 0.550 |                | 1.10627664 | 0.3778   | -0.186      | 1.52E-07 | 0.86          | 0.2648   |
| rs9268544   | 6   | 32385453      | G/A         | 0.550 |                | 1.10627664 | 0.3778   | -0.186      | 1.52E-07 | 0.86          | 0.2648   |
| rs9268545   | 6   | 32385750      | T/C         | 0.550 |                | 1.10627664 | 0.3778   | -0.186      | 1.52E-07 | 0.86          | 0.2648   |
| rs9268556   | 6   | 32386964      | T/C         | 0.550 |                | 1.10627664 | 0.3778   | -0.186      | 1.52E-07 | 0.86          | 0.2648   |
| rs9268557   | 6   | 32389305      | T/C         | 0.571 |                | 1.05865581 | 0.6192   | -0.166      | 2.58E-06 | 0.995         | 0.1954   |
| rs6912382   | 6   | 32389375      | C/T         | 0.229 |                | 1.18530485 | 0.1903   | 0.19        | 2.75E-06 | -1.22         | 0.1643   |
| rs9268568   | 6   | 32390904      | G/A         | 0.562 |                | 1.10960045 | 0.3583   | -0.178      | 4.68E-07 | 1.179         | 0.1252   |
| rs2157332   | 6   | 32392661      | C/T         | 0.564 |                | 1.09855975 | 0.4082   | -0.174      | 8.14E-07 | 1.238         | 0.1069   |
| rs9968904   | 6   | 32392710      | C/A         | 0.189 |                | 1.13314845 | 0.3685   | 0.195       | 7.94E-06 | -1.173        | 0.2145   |
| rs2187818   | 6   | 32395568      | G/T         | 0.564 |                | 1.09526901 | 0.421    | -0.174      | 7.92E-07 | 1.254         | 0.102    |
| rs9268578   | 6   | 32396057      | A/G         | 0.564 |                | 1.09526901 | 0.421    | -0.174      | 7.92E-07 | 1.254         | 0.102    |
| rs9268579   | 6   | 32396450      | G/A         | 0.564 |                | 1.09526901 | 0.421    | -0.174      | 7.92E-07 | 1.254         | 0.102    |
|             | 6   | 32396681      | CATTACTG/C  | 0.564 |                | 1.09526901 | 0.421    | -0.174      | 7.92E-07 | 1.254         | 0.102    |
| rs9268580   | 6   | 32396905      | G/C         | 0.564 |                | 1.09526901 | 0.422    | -0.174      | 7.94E-07 | 1.255         | 0.1019   |
| rs9268582   | 6   | 32396964      | C/T         | 0.563 |                | 1.10738347 | 0.3698   | -0.169      | 1.67E-06 | 1.294         | 0.09191  |
| rs9268583   | 6   | 32397266      | T/G         | 0.564 |                | 1.09526901 | 0.421    | -0.174      | 7.92E-07 | 1.254         | 0.102    |
| rs9268585   | 6   | 32397403      | T/G         | 0.564 |                | 1.09526901 | 0.421    | -0.174      | 7.92E-07 | 1.254         | 0.102    |
| rs9268588   | 6   | 32397794      | C/G         | 0.568 |                | 1.11404775 | 0.3389   | -0.171      | 1.21E-06 | 1.164         | 0.1277   |
| rs9268589   | 6   | 32398202      | G/A         | 0.568 |                | 1.11404775 | 0.3389   | -0.171      | 1.21E-06 | 1.164         | 0.1277   |
| rs7774047   | 6   | 32398563      | C/A         | 0.568 |                | 1.11404775 | 0.3389   | -0.171      | 1.21E-06 | 1.164         | 0.1277   |
| rs7756262   | 6   | 32398675      | T/A         | 0.568 |                | 1.11404775 | 0.3389   | -0.171      | 1.21E-06 | 1.164         | 0.1277   |
|             | 6   | 32398790      | GAGTTA/G    | 0.568 |                | 1.11404775 | 0.3389   | -0.171      | 1.21E-06 | 1.164         | 0.1277   |
|             | 6   | 32398948      | T/TA        | 0.568 |                | 1.11404775 | 0.3389   | -0.171      | 1.21E-06 | 1.164         | 0.1277   |
| rs4348358   | 6   | 32399092      | G/A         | 0.568 |                | 1.11404775 | 0.3389   | -0.171      | 1.21E-06 | 1.164         | 0.1277   |

| rsID        | chr | hg19 position | REF/ALT  | MAF   | Nearby gene(s) | Asthma     |         | Log10(IgE)  |          | Lung Function |         |
|-------------|-----|---------------|----------|-------|----------------|------------|---------|-------------|----------|---------------|---------|
|             |     |               |          |       |                | OR         | P value | Effect Size | P value  | Effect Size   | P value |
| rs4321864   | 6   | 32399187      | C/A      | 0.495 |                | 1.04498235 | 0.7004  | -0.176      | 7.90E-07 | 1.486         | 0.05482 |
| rs9268605   | 6   | 32399833      | G/A      | 0.568 |                | 1.11404775 | 0.3389  | -0.171      | 1.21E-06 | 1.164         | 0.1277  |
| rs9268606   | 6   | 32400070      | G/A      | 0.568 |                | 1.11404775 | 0.3389  | -0.171      | 1.21E-06 | 1.164         | 0.1277  |
| rs9268607   | 6   | 32400538      | A/G      | 0.568 |                | 1.11404775 | 0.3389  | -0.171      | 1.21E-06 | 1.164         | 0.1277  |
|             | 6   | 32400833      | AT/A     | 0.568 |                | 1.11404775 | 0.3389  | -0.171      | 1.16E-06 | 1.165         | 0.1277  |
| rs9268608   | 6   | 32400865      | C/T      | 0.568 |                | 1.11404775 | 0.3389  | -0.171      | 1.21E-06 | 1.164         | 0.1277  |
| rs9268609   | 6   | 32401261      | G/A      | 0.568 |                | 1.11404775 | 0.3389  | -0.171      | 1.21E-06 | 1.164         | 0.1277  |
| rs9268610   | 6   | 32401263      | T/C      | 0.568 |                | 1.11404775 | 0.3389  | -0.171      | 1.21E-06 | 1.164         | 0.1277  |
| rs1987305   | 6   | 32401996      | G/T      | 0.568 |                | 1.11404775 | 0.3389  | -0.171      | 1.21E-06 | 1.164         | 0.1277  |
|             | 6   | 32402116      | T/TG     | 0.564 |                | 1.09526901 | 0.4209  | -0.174      | 7.88E-07 | 1.255         | 0.102   |
| rs960736    | 6   | 32402225      | T/C      | 0.568 |                | 1.11404775 | 0.3388  | -0.171      | 1.21E-06 | 1.164         | 0.1277  |
| rs7753264   | 6   | 32402440      | A/G      | 0.568 |                | 1.11404775 | 0.3389  | -0.171      | 1.21E-06 | 1.164         | 0.1277  |
| rs7773756   | 6   | 32402464      | T/C      | 0.568 |                | 1.11404775 | 0.3389  | -0.171      | 1.21E-06 | 1.164         | 0.1277  |
| rs9268613   | 6   | 32402692      | C/T      | 0.568 |                | 1.11404775 | 0.3389  | -0.171      | 1.21E-06 | 1.164         | 0.1277  |
| rs9268615   | 6   | 32402889      | G/A      | 0.568 |                | 1.11404775 | 0.3389  | -0.171      | 1.21E-06 | 1.164         | 0.1277  |
| rs4612206   | 6   | 32404093      | C/T      | 0.568 |                | 1.11404775 | 0.3389  | -0.171      | 1.21E-06 | 1.164         | 0.1277  |
|             | 6   | 32405692      | GA/G     | 0.568 |                | 1.11404775 | 0.3387  | -0.171      | 1.21E-06 | 1.164         | 0.1277  |
| rs9268634   | 6   | 32406530      | G/A      | 0.568 |                | 1.11404775 | 0.3389  | -0.171      | 1.21E-06 | 1.164         | 0.1277  |
| rs3763322   | 6   | 32406807      | G/A      | 0.584 |                | 1.11627807 | 0.337   | -0.16       | 8.24E-06 | 1.382         | 0.07452 |
| rs14004     | 6   | 32407709      | C/A      | 0.583 | HLA-DRA        | 1.11293425 | 0.3489  | -0.16       | 7.82E-06 | 1.385         | 0.074   |
| rs9268645   | 6   | 32408527      | C/G      | 0.566 | HLA-DRA        | 1.13088442 | 0.2773  | -0.171      | 1.19E-06 | 1.025         | 0.1807  |
| rs3129880   | 6   | 32408917      | T/C      | 0.778 | HLA-DRA        | 0.88603396 | 0.3495  | -0.194      | 1.68E-06 | 1.17          | 0.1819  |
| rs9268652   | 6   | 32409056      | A/G      | 0.770 | HLA-DRA        | 0.85129207 | 0.208   | -0.2        | 5.05E-07 | 1.138         | 0.1878  |
| rs9268657   | 6   | 32409656      | G/A      | 0.562 | HLA-DRA        | 1.11182188 | 0.3493  | -0.174      | 8.23E-07 | 1.072         | 0.1632  |
| rs3129883   | 6   | 32410137      | T/C      | 0.766 | HLA-DRA        | 0.86070798 | 0.2371  | -0.2        | 3.90E-07 | 0.929         | 0.2787  |
| rs3129886   | 6   | 32410576      | T/C      | 0.766 | HLA-DRA        | 0.86070798 | 0.2371  | -0.2        | 3.90E-07 | 0.929         | 0.2787  |
| rs3129888   | 6   | 32411726      | G/A      | 0.781 | HLA-DRA        | 0.8361059  | 0.168   | -0.2        | 8.42E-07 | 1.293         | 0.1427  |
| rs2239802   | 6   | 32411846      | C/G      | 0.773 | HLA-DRA        | 0.83360134 | 0.1552  | -0.203      | 3.32E-07 | 1.091         | 0.2078  |
| rs3135390   | 6   | 32412395      | C/A      | 0.781 | HLA-DRA        | 0.8361059  | 0.168   | -0.2        | 8.42E-07 | 1.293         | 0.1427  |
| rs7196      | 6   | 32412571      | A/T      | 0.773 | HLA-DRA        | 0.83360134 | 0.1552  | -0.203      | 3.32E-07 | 1.091         | 0.2078  |
| rs7197      | 6   | 32412580      | T/C      | 0.784 | HLA-DRA        | 0.86156911 | 0.2528  | -0.196      | 1.58E-06 | 1.315         | 0.1379  |
| rs2395182   | 6   | 32413317      | G/T      | 0.773 |                | 0.83360134 | 0.1552  | -0.203      | 3.32E-07 | 1.091         | 0.2078  |
| rs9268671   | 6   | 32414290      | A/G      | 0.758 |                | 0.8976276  | 0.394   | -0.198      | 4.55E-07 | 1.385         | 0.1038  |
| rs7382085   | 6   | 32414420      | G/A      | 0.771 |                | 0.84619961 | 0.1919  | -0.2        | 5.01E-07 | 1.037         | 0.2315  |
| rs7382354   | 6   | 32414639      | G/A      | 0.771 |                | 0.84619961 | 0.1919  | -0.2        | 5.01E-07 | 1.037         | 0.2315  |
| rs3135387   | 6   | 32415109      | T/G      | 0.779 |                | 0.84874202 | 0.2078  | -0.197      | 1.29E-06 | 1.235         | 0.1613  |
| rs3135385   | 6   | 32416366      | A/G      | 0.770 |                | 0.84619961 | 0.1922  | -0.2        | 5.02E-07 | 1.037         | 0.2314  |
| rs199661956 | 6   | 32416739      | T/C      | 0.196 |                | 1.14453678 | 0.3297  | 0.208       | 1.72E-06 | -1.523        | 0.1061  |
|             | 6   | 32417020      | A/AGAAAG | 0.227 |                | 1.05865581 | 0.667   | 0.199       | 1.31E-06 | -1.441        | 0.1065  |
| rs9461747   | 6   | 32417937      | C/T      | 0.197 |                | 1.14453678 | 0.3301  | 0.208       | 1.72E-06 | -1.526        | 0.1052  |
| rs9469114   | 6   | 32418188      | G/T      | 0.197 |                | 1.14453678 | 0.3301  | 0.208       | 1.72E-06 | -1.526        | 0.1052  |
| rs6938382   | 6   | 32418227      | G/A      | 0.205 |                | 1.1491241  | 0.3064  | 0.21        | 7.19E-07 | -1.281        | 0.1641  |
| rs9461748   | 6   | 32418948      | T/C      | 0.202 |                | 1.14797555 | 0.3156  | 0.207       | 1.41E-06 | -1.44         | 0.1212  |
| rs12528026  | 6   | 32419116      | A/G      | 0.197 |                | 1.14453678 | 0.3301  | 0.208       | 1.72E-06 | -1.526        | 0.1053  |
| rs12524661  | 6   | 32419204      | G/A      | 0.197 |                | 1.14453678 | 0.3301  | 0.208       | 1.72E-06 | -1.526        | 0.1053  |
| rs9469116   | 6   | 32419994      | G/A      | 0.197 |                | 1.14453678 | 0.3302  | 0.208       | 1.72E-06 | -1.526        | 0.1052  |
|             | 6   | 32420303      | CAGA/C   | 0.193 |                | 1.10186037 | 0.4867  | 0.201       | 4.62E-06 | -1.593        | 0.09341 |
| rs7760260   | 6   | 32421071      | G/A      | 0.205 |                | 1.1491241  | 0.3064  | 0.21        | 7.19E-07 | -1.28         | 0.1642  |
| rs7760600   | 6   | 32421345      | G/A      | 0.196 |                | 1.14453678 | 0.3302  | 0.208       | 1.72E-06 | -1.527        | 0.105   |
| rs7764351   | 6   | 32421631      | A/G      | 0.205 |                | 1.1491241  | 0.3064  | 0.21        | 7.18E-07 | -1.28         | 0.1642  |
| rs6457590   | 6   | 32421798      | G/T      | 0.205 |                | 1.1491241  | 0.3064  | 0.21        | 7.18E-07 | -1.28         | 0.1642  |
| rs12526155  | 6   | 32422247      | G/A      | 0.177 |                | 1.07573054 | 0.6136  | 0.202       | 9.25E-06 | -1.613        | 0.1014  |
| rs113928914 | 6   | 32423195      | G/A      | 0.196 |                | 1.14339282 | 0.3348  | 0.208       | 1.66E-06 | -1.541        | 0.1021  |
| rs57723712  | 6   | 32423409      | A/C      | 0.205 |                | 1.1491241  | 0.3067  | 0.21        | 7.20E-07 | -1.282        | 0.1635  |
| rs59281193  | 6   | 32423601      | C/T      | 0.205 |                | 1.1491241  | 0.3066  | 0.21        | 7.19E-07 | -1.282        | 0.1635  |
| rs12530431  | 6   | 32423986      | A/G      | 0.177 |                | 1.07680681 | 0.6125  | 0.202       | 9.06E-06 | -1.618        | 0.1006  |
| rs7776297   | 6   | 32424108      | C/T      | 0.205 |                | 1.1491241  | 0.3068  | 0.21        | 7.16E-07 | -1.283        | 0.1633  |
| rs117429202 | 6   | 32426100      | T/C      | 0.204 |                | 1.14682815 | 0.3139  | 0.211       | 6.77E-07 | -1.361        | 0.1403  |
| rs144549083 | 6   | 32426355      | G/A      | 0.196 |                | 1.14110832 | 0.3446  | 0.209       | 1.66E-06 | -1.633        | 0.08409 |
| rs145590657 | 6   | 32426634      | G/C      | 0.176 |                | 1.07036531 | 0.6416  | 0.202       | 9.52E-06 | -1.742        | 0.07752 |
| rs4632888   | 6   | 32426873      | T/C      | 0.196 |                | 1.13996778 | 0.3499  | 0.209       | 1.66E-06 | -1.669        | 0.07776 |
| rs9469118   | 6   | 32427154      | T/G      | 0.215 |                | 1.10075906 | 0.4816  | 0.209       | 7.86E-07 | -1.375        | 0.1352  |
| rs9469119   | 6   | 32427155      | C/A      | 0.215 |                | 1.10075906 | 0.4814  | 0.209       | 7.94E-07 | -1.377        | 0.1347  |
| rs58302219  | 6   | 32430368      | C/A      | 0.198 |                | 1.15719619 | 0.2891  | 0.201       | 2.93E-06 | -1.266        | 0.1744  |
| rs9469131   | 6   | 32445790      | G/C      | 0.200 |                | 1.14682815 | 0.3183  | 0.194       | 5.77E-06 | -1.207        | 0.1933  |



| rsID        | chr | hg19 position | REF/ALT | MAF   | Nearby gene(s) | Asthma     |         | Log10(IgE)  |          | Lung Function |         |
|-------------|-----|---------------|---------|-------|----------------|------------|---------|-------------|----------|---------------|---------|
|             |     |               |         |       |                | OR         | P value | Effect Size | P value  | Effect Size   | P value |
| rs28528859  | 6   | 32451395      | G/A     | 0.390 |                | 1.08545581 | 0.5286  | -0.204      | 5.09E-07 | 1.631         | 0.06416 |
| rs28599891  | 6   | 32452470      | C/G     | 0.690 |                | 0.7945336  | 0.05949 | -0.169      | 9.45E-06 | 0.855         | 0.2994  |
| rs57689942  | 6   | 32543079      | G/A     | 0.369 |                | 1.13882838 | 0.5341  | -0.291      | 8.19E-06 | 1.578         | 0.2638  |
| rs9270461   | 6   | 32558911      | C/T     | 0.693 |                | 0.79612426 | 0.1084  | -0.202      | 5.44E-06 | 0.578         | 0.5475  |
| rs28366283  | 6   | 32560288      | A/C     | 0.521 |                | 0.93239382 | 0.5878  | -0.193      | 1.53E-06 | 1.151         | 0.1865  |
| rs9270664   | 6   | 32566149      | G/A     | 0.679 |                | 0.85129207 | 0.1717  | -0.168      | 4.85E-06 | 0.789         | 0.3227  |
| rs141890408 | 6   | 32567296      | G/C     | 0.678 |                | 0.8504412  | 0.1692  | -0.169      | 4.72E-06 | 0.79          | 0.3227  |
| rs182983566 | 6   | 32569297      | A/G     | 0.678 |                | 0.8504412  | 0.169   | -0.169      | 4.87E-06 | 0.786         | 0.3253  |
|             | 6   | 32571607      | C/CA    | 0.254 |                | 0.94176453 | 0.7206  | 0.281       | 8.08E-08 | -1.354        | 0.2351  |
| rs9270910   | 6   | 32572180      | G/C     | 0.665 |                | 0.81791243 | 0.08534 | -0.166      | 5.97E-06 | 0.585         | 0.4607  |
| rs9270911   | 6   | 32572202      | C/T     | 0.665 |                | 0.81791243 | 0.08531 | -0.166      | 6.00E-06 | 0.585         | 0.4611  |
| rs9271365   | 6   | 32586794      | T/G     | 0.618 |                | 0.87022803 | 0.2209  | -0.18       | 3.48E-07 | 0.848         | 0.2694  |
| rs9271367   | 6   | 32586908      | G/A     | 0.750 |                | 0.9012253  | 0.4147  | -0.2        | 4.53E-07 | 0.42          | 0.6261  |
| rs557011    | 6   | 32587013      | C/T     | 0.509 |                | 1.14453678 | 0.2264  | -0.169      | 1.21E-06 | 0.806         | 0.2869  |
| rs9271382   | 6   | 32587375      | G/A     | 0.674 |                | 0.86588775 | 0.2245  | -0.173      | 2.82E-06 | 0.974         | 0.2235  |
| rs9271383   | 6   | 32587391      | C/T     | 0.660 |                | 0.83110428 | 0.1158  | -0.17       | 3.63E-06 | 0.769         | 0.3338  |
| rs9271386   | 6   | 32587416      | T/G     | 0.674 |                | 0.86675407 | 0.2264  | -0.173      | 2.80E-06 | 0.975         | 0.2228  |
| rs9271386   | 6   | 32587416      | T/G     | 0.674 |                | 0.86675407 | 0.2264  | -0.173      | 2.80E-06 | 0.975         | 0.2228  |
| rs9271387   | 6   | 32587424      | C/T     | 0.657 |                | 0.8319358  | 0.119   | -0.171      | 3.50E-06 | 0.779         | 0.3304  |
| rs9271388   | 6   | 32587426      | A/C     | 0.658 |                | 0.83027359 | 0.1153  | -0.172      | 3.19E-06 | 0.78          | 0.3289  |
| rs9271389   | 6   | 32587431      | T/C     | 0.671 |                | 0.86675407 | 0.2307  | -0.174      | 2.74E-06 | 0.985         | 0.221   |
| rs9271390   | 6   | 32587440      | A/G     | 0.683 |                | 0.84535383 | 0.1629  | -0.18       | 1.55E-06 | 1.026         | 0.2069  |
| rs9271391   | 6   | 32587442      | G/A     | 0.683 |                | 0.84535383 | 0.1629  | -0.18       | 1.55E-06 | 1.026         | 0.2069  |
| rs9271393   | 6   | 32587457      | G/C     | 0.683 |                | 0.84619961 | 0.1631  | -0.18       | 1.51E-06 | 1.022         | 0.2082  |
| rs80285039  | 6   | 32587510      | C/T     | 0.673 |                | 0.86588775 | 0.223   | -0.173      | 2.92E-06 | 0.97          | 0.2259  |
| rs9271414   | 6   | 32587782      | C/T     | 0.685 |                | 0.8445089  | 0.1577  | -0.178      | 1.67E-06 | 1.02          | 0.207   |
| rs9271415   | 6   | 32587786      | C/T     | 0.685 |                | 0.8445089  | 0.1577  | -0.178      | 1.67E-06 | 1.02          | 0.207   |
| rs9271418   | 6   | 32587832      | A/G     | 0.707 |                | 0.8402969  | 0.152   | -0.172      | 6.08E-06 | 0.549         | 0.5049  |
| rs9271420   | 6   | 32587852      | A/G     | 0.671 |                | 0.81139524 | 0.0771  | -0.174      | 2.35E-06 | 0.803         | 0.3163  |
| rs9271436   | 6   | 32588110      | C/A     | 0.686 |                | 0.8445089  | 0.1575  | -0.178      | 1.61E-06 | 1.01          | 0.2105  |
| rs9271440   | 6   | 32588240      | C/T     | 0.684 |                | 0.84535383 | 0.1596  | -0.179      | 1.66E-06 | 1.02          | 0.2073  |
| rs9271441   | 6   | 32588245      | T/C     | 0.671 |                | 0.81220704 | 0.07892 | -0.175      | 2.25E-06 | 0.808         | 0.3143  |
| rs9271444   | 6   | 32588281      | A/G     | 0.684 |                | 0.84535383 | 0.1596  | -0.179      | 1.67E-06 | 1.019         | 0.2081  |
| rs9271446   | 6   | 32588344      | A/G     | 0.683 |                | 0.84282157 | 0.154   | -0.179      | 1.60E-06 | 0.993         | 0.2212  |
| rs9271453   | 6   | 32588416      | A/T     | 0.704 |                | 0.8445089  | 0.166   | -0.174      | 5.23E-06 | 0.582         | 0.4817  |
| rs9271457   | 6   | 32588446      | C/T     | 0.682 |                | 0.84874202 | 0.1734  | -0.181      | 1.37E-06 | 1.048         | 0.197   |
| rs9271463   | 6   | 32588535      | A/T     | 0.684 |                | 0.84959119 | 0.1727  | -0.18       | 1.35E-06 | 1.049         | 0.195   |
| rs9271467   | 6   | 32588613      | T/C     | 0.686 |                | 0.84535383 | 0.1592  | -0.178      | 1.60E-06 | 1.01          | 0.2106  |
| rs9271468   | 6   | 32588616      | G/A     | 0.686 |                | 0.84535383 | 0.1592  | -0.178      | 1.60E-06 | 1.01          | 0.2106  |
| rs9271475   | 6   | 32588808      | A/T     | 0.686 |                | 0.84535383 | 0.1596  | -0.179      | 1.58E-06 | 1.01          | 0.2107  |
| rs9271476   | 6   | 32588809      | T/G     | 0.686 |                | 0.84535383 | 0.1595  | -0.178      | 1.58E-06 | 1.011         | 0.2101  |
| rs9271477   | 6   | 32588815      | C/T     | 0.686 |                | 0.84535383 | 0.1596  | -0.179      | 1.58E-06 | 1.01          | 0.2107  |
| rs9271478   | 6   | 32588821      | A/G     | 0.686 |                | 0.84535383 | 0.1596  | -0.179      | 1.58E-06 | 1.01          | 0.2107  |
| rs9271479   | 6   | 32588830      | G/A     | 0.686 |                | 0.84535383 | 0.1596  | -0.179      | 1.57E-06 | 1.01          | 0.2107  |
| rs9271482   | 6   | 32588880      | C/T     | 0.686 |                | 0.84366482 | 0.1539  | -0.177      | 1.93E-06 | 1.014         | 0.2083  |
| rs9271483   | 6   | 32588882      | G/T     | 0.686 |                | 0.84366482 | 0.1539  | -0.177      | 1.93E-06 | 1.014         | 0.2084  |
| rs9271487   | 6   | 32588985      | G/T     | 0.686 |                | 0.8445089  | 0.1571  | -0.178      | 1.71E-06 | 1.012         | 0.2098  |
| rs9271490   | 6   | 32589060      | A/G     | 0.686 |                | 0.84535383 | 0.159   | -0.178      | 1.60E-06 | 1.011         | 0.21    |
| rs9271491   | 6   | 32589061      | A/G     | 0.686 |                | 0.84535383 | 0.159   | -0.178      | 1.60E-06 | 1.011         | 0.21    |
| rs9271493   | 6   | 32589158      | A/G     | 0.686 |                | 0.84535383 | 0.159   | -0.178      | 1.60E-06 | 1.011         | 0.21    |
| rs9271495   | 6   | 32589242      | C/T     | 0.686 |                | 0.8445089  | 0.1585  | -0.179      | 1.67E-06 | 1.009         | 0.2122  |
| rs9271496   | 6   | 32589244      | C/T     | 0.686 |                | 0.8445089  | 0.1585  | -0.179      | 1.67E-06 | 1.009         | 0.2122  |
| rs9271505   | 6   | 32589375      | T/G     | 0.686 |                | 0.84535383 | 0.1588  | -0.178      | 1.61E-06 | 1.012         | 0.2097  |
| rs9271506   | 6   | 32589380      | C/T     | 0.686 |                | 0.84535383 | 0.1588  | -0.178      | 1.61E-06 | 1.012         | 0.2097  |
| rs9271507   | 6   | 32589394      | C/A     | 0.686 |                | 0.84535383 | 0.1588  | -0.178      | 1.61E-06 | 1.012         | 0.2097  |
| rs9271509   | 6   | 32589415      | G/A     | 0.420 |                | 1.05337574 | 0.6548  | -0.182      | 4.77E-07 | 1.269         | 0.106   |
| rs9271512   | 6   | 32589510      | A/G     | 0.686 |                | 0.84535383 | 0.1592  | -0.178      | 1.61E-06 | 1.01          | 0.2107  |
| rs9271514   | 6   | 32589613      | A/G     | 0.685 |                | 0.84535383 | 0.1593  | -0.179      | 1.62E-06 | 1.006         | 0.2131  |
| rs9271515   | 6   | 32589645      | A/G     | 0.685 |                | 0.84535383 | 0.1593  | -0.179      | 1.62E-06 | 1.006         | 0.2131  |
| rs9271518   | 6   | 32589745      | C/T     | 0.685 |                | 0.84535383 | 0.1591  | -0.179      | 1.58E-06 | 1.014         | 0.2094  |
| rs9271530   | 6   | 32589938      | A/G     | 0.685 |                | 0.84535383 | 0.1596  | -0.179      | 1.51E-06 | 1.017         | 0.2082  |
| rs9271531   | 6   | 32589939      | A/C     | 0.685 |                | 0.84535383 | 0.1596  | -0.179      | 1.51E-06 | 1.017         | 0.2082  |
| rs9271534   | 6   | 32589953      | C/A     | 0.685 |                | 0.84535383 | 0.1594  | -0.179      | 1.54E-06 | 1.014         | 0.2091  |
| rs9271543   | 6   | 32590097      | A/T     | 0.686 |                | 0.84535383 | 0.159   | -0.178      | 1.60E-06 | 1.011         | 0.21    |
| rs9271548   | 6   | 32590234      | A/T     | 0.686 |                | 0.84535383 | 0.1589  | -0.178      | 1.61E-06 | 1.011         | 0.21    |

| rsID        | chr | hg19 position | REF/ALT        | MAF   | Nearby gene(s) | Asthma     |         | Log10(IgE)  |          | Lung Function |         |
|-------------|-----|---------------|----------------|-------|----------------|------------|---------|-------------|----------|---------------|---------|
|             |     |               |                |       |                | OR         | P value | Effect Size | P value  | Effect Size   | P value |
| rs9271551   | 6   | 32590298      | A/G            | 0.681 |                | 0.84282157 | 0.1544  | -0.179      | 1.79E-06 | 1.015         | 0.2116  |
| rs9271553   | 6   | 32590299      | T/C            | 0.655 |                | 0.89404426 | 0.3635  | -0.183      | 2.12E-06 | 1.128         | 0.1771  |
| rs9271555   | 6   | 32590319      | T/G            | 0.684 |                | 0.84366482 | 0.1563  | -0.179      | 1.68E-06 | 1.015         | 0.2098  |
| rs9271556   | 6   | 32590324      | T/G            | 0.684 |                | 0.84366482 | 0.1562  | -0.179      | 1.68E-06 | 1.016         | 0.2091  |
| rs9271557   | 6   | 32590331      | T/C            | 0.684 |                | 0.8445089  | 0.1565  | -0.178      | 1.69E-06 | 1.016         | 0.2091  |
| rs9271579   | 6   | 32590637      | T/A            | 0.419 |                | 1.05337574 | 0.6536  | -0.182      | 4.83E-07 | 1.265         | 0.1078  |
| rs9271580   | 6   | 32590641      | T/G            | 0.419 |                | 1.05337574 | 0.6536  | -0.182      | 4.83E-07 | 1.265         | 0.1078  |
|             | 6   | 32590784      | T/TACAGAC      | 0.419 |                | 1.05337574 | 0.6542  | -0.182      | 4.78E-07 | 1.268         | 0.1066  |
| rs2097431   | 6   | 32590833      | A/G            | 0.727 |                | 0.89852567 | 0.3868  | -0.192      | 5.05E-07 | 1.218         | 0.1432  |
| rs2097431   | 6   | 32590833      | A/G            | 0.727 |                | 0.89852567 | 0.3868  | -0.192      | 5.05E-07 | 1.218         | 0.1432  |
| rs9271638   | 6   | 32592142      | C/T            | 0.718 |                | 0.87809543 | 0.2954  | -0.197      | 3.12E-07 | 1.417         | 0.09034 |
|             | 6   | 32592155      | TGAAATTTGGTA/T | 0.661 |                | 0.88514837 | 0.3437  | -0.216      | 7.31E-08 | 1.45          | 0.09638 |
| rs9271665   | 6   | 32592676      | G/A            | 0.723 |                | 0.87721777 | 0.2881  | -0.196      | 2.91E-07 | 1.412         | 0.08913 |
| rs9271669   | 6   | 32592775      | A/T            | 0.420 |                | 1.05337574 | 0.6551  | -0.182      | 4.79E-07 | 1.267         | 0.1061  |
| rs9271669   | 6   | 32592775      | A/T            | 0.420 |                | 1.05337574 | 0.6551  | -0.182      | 4.79E-07 | 1.267         | 0.1061  |
| rs9271726   | 6   | 32593566      | T/G            | 0.420 |                | 1.05337574 | 0.6518  | -0.182      | 4.85E-07 | 1.275         | 0.1044  |
| rs9271730   | 6   | 32593608      | G/A            | 0.714 |                | 0.876341   | 0.2866  | -0.196      | 4.06E-07 | 1.393         | 0.09741 |
| rs28445646  | 6   | 32593952      | C/G            | 0.212 |                | 1.12636992 | 0.39    | 0.195       | 7.54E-06 | -1.354        | 0.1506  |
| rs9271768   | 6   | 32594188      | A/T            | 0.505 |                | 1.07896257 | 0.5086  | -0.161      | 6.77E-06 | 1.189         | 0.125   |
|             | 6   | 32594850      | T/TCC          | 0.808 |                | 0.75881293 | 0.1724  | -0.292      | 3.33E-06 | 1.917         | 0.1588  |
| rs4959111   | 6   | 32597720      | T/C            | 0.245 |                | 1.10186037 | 0.4614  | 0.212       | 2.10E-07 | -1.625        | 0.06781 |
| rs9272021   | 6   | 32598515      | A/G            | 0.421 |                | 1.05337574 | 0.6557  | -0.183      | 4.61E-07 | 1.276         | 0.1048  |
|             | 6   | 32598754      | CTGG/C         | 0.290 |                | 1.10960045 | 0.4189  | 0.188       | 2.85E-06 | -1.196        | 0.1697  |
| rs147857322 | 6   | 32599601      | G/A            | 0.265 |                | 1.14225    | 0.2963  | 0.184       | 3.27E-06 | -1.125        | 0.1903  |
| rs35585151  | 6   | 32600046      | G/A            | 0.263 |                | 1.14568189 | 0.2829  | 0.184       | 3.40E-06 | -1.09         | 0.2033  |
|             | 6   | 32600116      | GT/G           | 0.420 |                | 1.05337574 | 0.6551  | -0.182      | 4.79E-07 | 1.267         | 0.1061  |
| rs35656734  | 6   | 32600153      | C/T            | 0.268 |                | 1.14225    | 0.2882  | 0.181       | 3.44E-06 | -1.084        | 0.1992  |
| rs3104372   | 6   | 32600983      | C/T            | 0.421 |                | 1.05232289 | 0.6591  | -0.182      | 4.51E-07 | 1.271         | 0.1056  |
| rs1826962   | 6   | 32601083      | T/C            | 0.420 |                | 1.05337574 | 0.6524  | -0.182      | 4.74E-07 | 1.274         | 0.1046  |
| rs2002777   | 6   | 32601332      | G/A            | 0.543 |                | 0.90574271 | 0.3814  | 0.161       | 5.49E-06 | -1.341        | 0.08059 |
| rs115566240 | 6   | 32601718      | C/T            | 0.263 |                | 1.13541702 | 0.3172  | 0.185       | 3.15E-06 | -1.133        | 0.1871  |
| rs114020256 | 6   | 32601797      | G/A            | 0.262 |                | 1.136553   | 0.3164  | 0.185       | 3.54E-06 | -1.094        | 0.2048  |
|             | 6   | 32602002      | A/ACT          | 0.543 |                | 0.90755601 | 0.4003  | 0.164       | 5.24E-06 | -1.294        | 0.09633 |
| rs3104371   | 6   | 32602137      | C/G            | 0.420 |                | 1.05337574 | 0.6545  | -0.182      | 4.83E-07 | 1.267         | 0.1063  |
| rs9272226   | 6   | 32602396      | C/T            | 0.550 |                | 0.91393119 | 0.4299  | 0.165       | 3.86E-06 | -1.286        | 0.09577 |
| rs17205191  | 6   | 32602556      | G/A            | 0.268 |                | 1.14225    | 0.2883  | 0.181       | 3.44E-06 | -1.084        | 0.1993  |
|             | 6   | 32602665      | C/CT           | 0.344 |                | 1.24607673 | 0.06736 | 0.191       | 3.36E-07 | -1.077        | 0.185   |
| rs9272245   | 6   | 32602872      | C/G            | 0.549 |                | 0.91393119 | 0.4287  | 0.165       | 3.92E-06 | -1.285        | 0.09609 |
| rs1391372   | 6   | 32603668      | A/C            | 0.432 |                | 1.03045453 | 0.7918  | -0.179      | 4.91E-07 | 1.252         | 0.1056  |
| rs1391372   | 6   | 32603668      | A/C            | 0.432 |                | 1.03045453 | 0.7918  | -0.179      | 4.91E-07 | 1.252         | 0.1056  |
| rs9272293   | 6   | 32603742      | A/G            | 0.717 |                | 0.85641518 | 0.2108  | -0.18       | 2.96E-06 | 0.675         | 0.42    |
| rs1391371   | 6   | 32603798      | A/T            | 0.420 |                | 1.05232289 | 0.6569  | -0.182      | 4.64E-07 | 1.269         | 0.1059  |
| rs1826961   | 6   | 32603866      | C/T            | 0.567 |                | 1.02634095 | 0.8391  | -0.191      | 1.38E-06 | 1.349         | 0.1165  |
| rs1826961   | 6   | 32603866      | C/T            | 0.567 |                | 1.02634095 | 0.8391  | -0.191      | 1.38E-06 | 1.349         | 0.1165  |
| rs9272320   | 6   | 32604124      | G/A            | 0.706 |                | 0.84113761 | 0.161   | -0.186      | 1.48E-06 | 0.955         | 0.2532  |
|             | 6   | 32604332      | TG/T           | 0.671 |                | 0.8976276  | 0.5064  | -0.255      | 4.02E-07 | 1.536         | 0.1603  |
| rs9272353   | 6   | 32604456      | G/C            | 0.418 |                | 1.05442965 | 0.6517  | -0.183      | 4.77E-07 | 1.273         | 0.107   |
| rs9272363   | 6   | 32604585      | A/T            | 0.423 |                | 1.05654061 | 0.6422  | -0.184      | 5.47E-07 | 1.279         | 0.1092  |
| rs9272381   | 6   | 32604742      | G/C            | 0.422 |                | 1.05654061 | 0.6401  | -0.185      | 5.40E-07 | 1.284         | 0.1089  |
| rs9272385   | 6   | 32604763      | T/C            | 0.423 |                | 1.05654061 | 0.6425  | -0.184      | 5.30E-07 | 1.277         | 0.11    |
| rs9272400   | 6   | 32604898      | G/A            | 0.689 |                | 0.82944374 | 0.1552  | -0.187      | 5.64E-06 | 1.295         | 0.1456  |
| rs9272412   | 6   | 32604982      | A/G            | 0.452 |                | 1.08980633 | 0.4806  | -0.196      | 2.80E-07 | 1.35          | 0.1031  |
| rs9272412   | 6   | 32604982      | A/G            | 0.452 |                | 1.08980633 | 0.4806  | -0.196      | 2.80E-07 | 1.35          | 0.1031  |
|             | 6   | 32605027      | C/CACA         | 0.698 |                | 0.84619961 | 0.1676  | -0.182      | 1.39E-06 | 0.934         | 0.2545  |
| rs9272425   | 6   | 32605178      | T/C            | 0.426 | HLA-DQA1       | 1.05865581 | 0.6321  | -0.184      | 6.57E-07 | 1.273         | 0.1125  |
| rs1047989   | 6   | 32605257      | C/A            | 0.702 | HLA-DQA1       | 0.84619961 | 0.1648  | -0.181      | 1.44E-06 | 0.943         | 0.2464  |
| rs2213287   | 6   | 32605508      | G/T            | 0.513 | HLA-DQA1       | 0.92867169 | 0.5464  | -0.186      | 1.09E-06 | 1.183         | 0.1531  |
| rs9272456   | 6   | 32605555      | T/A            | 0.419 | HLA-DQA1       | 1.05442965 | 0.6501  | -0.183      | 4.87E-07 | 1.273         | 0.1077  |
| rs9272460   | 6   | 32605583      | A/G            | 0.449 | HLA-DQA1       | 1.02020134 | 0.8608  | -0.166      | 3.88E-06 | 1.348         | 0.08465 |
| rs9272461   | 6   | 32605609      | G/A            | 0.418 | HLA-DQA1       | 1.05442965 | 0.6505  | -0.183      | 4.83E-07 | 1.272         | 0.1075  |
| rs9272466   | 6   | 32605696      | G/T            | 0.417 | HLA-DQA1       | 1.05442965 | 0.6515  | -0.183      | 4.77E-07 | 1.274         | 0.1073  |
| rs9272479   | 6   | 32605789      | C/T            | 0.226 | HLA-DQA1       | 1.10517092 | 0.4564  | 0.2         | 1.69E-06 | -1.158        | 0.2019  |
| rs9272479   | 6   | 32605789      | C/T            | 0.226 | HLA-DQA1       | 1.10517092 | 0.4564  | 0.2         | 1.69E-06 | -1.158        | 0.2019  |
|             | 6   | 32606018      | TTTC/T         | 0.421 |                | 1.05232289 | 0.6664  | -0.185      | 4.35E-07 | 1.275         | 0.109   |

| rsID        | chr | hg19 position | REF/ALT | MAF   | Nearby gene(s) | Asthma     |         | Log10(IgE)  |          | Lung Function |          |
|-------------|-----|---------------|---------|-------|----------------|------------|---------|-------------|----------|---------------|----------|
|             |     |               |         |       |                | OR         | P value | Effect Size | P value  | Effect Size   | P value  |
| rs9272508   | 6   | 32606325      | G/A     | 0.733 | HLA-DQA1       | 0.82448197 | 0.1581  | -0.2        | 2.54E-06 | 0.944         | 0.3061   |
| rs9272521   | 6   | 32606479      | G/A     | 0.605 | HLA-DQA1       | 0.88692044 | 0.4819  | -0.252      | 2.50E-06 | 1.342         | 0.2466   |
| rs9272522   | 6   | 32606490      | G/A     | 0.604 | HLA-DQA1       | 0.88692044 | 0.4839  | -0.252      | 2.56E-06 | 1.329         | 0.2517   |
| rs41268938  | 6   | 32606616      | A/T     | 0.423 | HLA-DQA1       | 1.05442965 | 0.6536  | -0.186      | 4.81E-07 | 1.289         | 0.1075   |
| rs28383359  | 6   | 32606794      | T/C     | 0.712 | HLA-DQA1       | 0.8402969  | 0.2052  | -0.216      | 4.57E-07 | 1.338         | 0.1504   |
| rs28383361  | 6   | 32606846      | G/A     | 0.483 | HLA-DQA1       | 1.0314855  | 0.794   | -0.167      | 8.96E-06 | 1.202         | 0.1402   |
| rs28383362  | 6   | 32606864      | T/C     | 0.480 | HLA-DQA1       | 1.03251751 | 0.7896  | -0.166      | 9.49E-06 | 1.199         | 0.1401   |
| rs28383363  | 6   | 32606868      | T/C     | 0.481 | HLA-DQA1       | 1.03251751 | 0.7894  | -0.166      | 9.48E-06 | 1.198         | 0.1403   |
| rs41268940  | 6   | 32606987      | T/G     | 0.421 | HLA-DQA1       | 1.05442965 | 0.6529  | -0.185      | 4.71E-07 | 1.283         | 0.1084   |
| rs41268942  | 6   | 32607126      | A/G     | 0.422 | HLA-DQA1       | 1.04707441 | 0.695   | -0.188      | 3.37E-07 | 1.291         | 0.1077   |
| rs28383371  | 6   | 32607154      | C/T     | 0.478 | HLA-DQA1       | 1.03355054 | 0.7856  | -0.166      | 1.00E-05 | 1.189         | 0.1439   |
| rs28383378  | 6   | 32607239      | C/A     | 0.478 | HLA-DQA1       | 1.0314855  | 0.7927  | -0.166      | 9.75E-06 | 1.186         | 0.1432   |
| rs28383379  | 6   | 32607242      | G/A     | 0.478 | HLA-DQA1       | 1.0314855  | 0.793   | -0.166      | 9.77E-06 | 1.186         | 0.1433   |
| rs28383380  | 6   | 32607253      | C/A     | 0.478 | HLA-DQA1       | 1.0314855  | 0.7935  | -0.165      | 9.94E-06 | 1.184         | 0.1433   |
| rs35248896  | 6   | 32607370      | C/T     | 0.409 | HLA-DQA1       | 1.05442965 | 0.6564  | -0.186      | 5.34E-07 | 1.262         | 0.1178   |
| rs41269944  | 6   | 32607627      | C/T     | 0.417 | HLA-DQA1       | 1.05337574 | 0.6544  | -0.184      | 4.94E-07 | 1.282         | 0.106    |
| rs9272608   | 6   | 32607737      | T/A     | 0.418 | HLA-DQA1       | 1.05442965 | 0.6493  | -0.183      | 4.74E-07 | 1.272         | 0.1074   |
| rs9272608   | 6   | 32607737      | T/A     | 0.418 | HLA-DQA1       | 1.05442965 | 0.6493  | -0.183      | 4.74E-07 | 1.272         | 0.1074   |
| rs9272608   | 6   | 32607737      | T/A     | 0.418 | HLA-DQA1       | 1.05442965 | 0.6493  | -0.183      | 4.74E-07 | 1.272         | 0.1074   |
| rs41269945  | 6   | 32607853      | A/T     | 0.418 | HLA-DQA1       | 1.05337574 | 0.6522  | -0.183      | 4.77E-07 | 1.27          | 0.1074   |
| rs9272617   | 6   | 32607926      | T/G     | 0.730 | HLA-DQA1       | 0.87721777 | 0.3105  | -0.193      | 1.52E-06 | 1.176         | 0.1765   |
| rs17426593  | 6   | 32608077      | T/C     | 0.418 | HLA-DQA1       | 1.05337574 | 0.6522  | -0.183      | 4.79E-07 | 1.271         | 0.1073   |
|             | 6   | 32608178      | CA/GA   | 0.418 |                | 1.05442965 | 0.6503  | -0.183      | 4.72E-07 | 1.273         | 0.1071   |
| rs41269955  | 6   | 32608269      | G/A     | 0.414 | HLA-DQA1       | 1.05654061 | 0.6416  | -0.185      | 4.76E-07 | 1.277         | 0.1087   |
| rs28383409  | 6   | 32608279      | T/G     | 0.689 | HLA-DQA1       | 0.92403992 | 0.642   | -0.256      | 1.16E-06 | 1.258         | 0.2715   |
|             | 6   | 32608334      | GAAA/G  | 0.421 |                | 1.04917066 | 0.7127  | 0.218       | 6.49E-08 | -1.377        | 0.1163   |
| rs34141382  | 6   | 32608478      | T/C     | 0.413 | HLA-DQA1       | 1.05654061 | 0.6403  | -0.185      | 4.94E-07 | 1.26          | 0.1151   |
| rs28383417  | 6   | 32608507      | A/C     | 0.418 | HLA-DQA1       | 1.05337574 | 0.6525  | -0.183      | 4.78E-07 | 1.271         | 0.1071   |
| rs36151380  | 6   | 32608886      | T/C     | 0.397 | HLA-DQA1       | 1.06289891 | 0.6186  | -0.193      | 4.89E-07 | 1.296         | 0.1199   |
| rs34763586  | 6   | 32608998      | T/C     | 0.419 | HLA-DQA1       | 1.05337574 | 0.6527  | -0.183      | 4.73E-07 | 1.269         | 0.1074   |
| rs1129753   | 6   | 32609130      | C/T     | 0.248 | HLA-DQA1       | 0.99104038 | 0.9574  | -0.228      | 6.07E-06 | 2.966         | 0.006381 |
| rs12722072  | 6   | 32609239      | G/A     | 0.386 | HLA-DQA1       | 1.06715902 | 0.6057  | -0.199      | 4.55E-07 | 1.331         | 0.1198   |
| rs1142335   | 6   | 32609278      | G/C     | 0.664 | HLA-DQA1       | 0.8361059  | 0.1736  | -0.191      | 3.02E-06 | 0.847         | 0.3401   |
| rs1142335   | 6   | 32609278      | G/C     | 0.664 | HLA-DQA1       | 0.8361059  | 0.1736  | -0.191      | 3.02E-06 | 0.847         | 0.3401   |
| rs9272709   | 6   | 32609279      | C/T     | 0.664 | HLA-DQA1       | 0.8361059  | 0.1736  | -0.191      | 3.02E-06 | 0.847         | 0.3402   |
| rs28383454  | 6   | 32609370      | G/T     | 0.740 | HLA-DQA1       | 0.81220704 | 0.245   | -0.259      | 3.25E-06 | 0.789         | 0.5136   |
| rs35874654  | 6   | 32609479      | C/A     | 0.418 | HLA-DQA1       | 1.05442965 | 0.6514  | -0.183      | 4.73E-07 | 1.271         | 0.1073   |
| rs34965214  | 6   | 32609545      | C/T     | 0.418 | HLA-DQA1       | 1.05337574 | 0.652   | -0.183      | 4.72E-07 | 1.272         | 0.1069   |
|             | 6   | 32609621      | GA/G    | 0.413 |                | 1.05865581 | 0.6268  | -0.187      | 4.04E-07 | 1.264         | 0.1146   |
|             | 6   | 32609696      | A/GAAG  | 0.445 |                | 1.04393789 | 0.7248  | -0.199      | 1.89E-07 | 1.402         | 0.09118  |
|             | 6   | 32609697      | CT/C    | 0.445 |                | 1.04393789 | 0.7246  | -0.199      | 1.89E-07 | 1.403         | 0.09115  |
| rs9272742   | 6   | 32609722      | C/T     | 0.420 | HLA-DQA1       | 1.05442965 | 0.6519  | -0.183      | 4.81E-07 | 1.273         | 0.1074   |
| rs114816840 | 6   | 32610214      | T/C     | 0.533 | HLA-DQA1       | 1.00400801 | 0.9764  | -0.195      | 1.79E-06 | 1.285         | 0.1456   |
| rs116613962 | 6   | 32610220      | A/G     | 0.533 | HLA-DQA1       | 1.00400801 | 0.9761  | -0.195      | 1.79E-06 | 1.285         | 0.1456   |
| rs9272785   | 6   | 32610401      | G/A     | 0.418 | HLA-DQA1       | 1.05337574 | 0.6539  | -0.183      | 4.81E-07 | 1.271         | 0.1072   |
| rs9272938   | 6   | 32611056      | C/T     | 0.403 | HLA-DQA1       | 1.05865581 | 0.6397  | -0.191      | 4.96E-07 | 1.297         | 0.1163   |
| rs707946    | 6   | 32611098      | G/T     | 0.403 | HLA-DQA1       | 1.05865581 | 0.6383  | -0.191      | 4.97E-07 | 1.297         | 0.1164   |
| rs9272951   | 6   | 32611125      | A/C     | 0.455 | HLA-DQA1       | 1.02839568 | 0.8118  | -0.166      | 9.39E-06 | 1.109         | 0.1713   |
| rs9272955   | 6   | 32611145      | T/A     | 0.457 | HLA-DQA1       | 1.0273678  | 0.8184  | -0.165      | 9.59E-06 | 1.107         | 0.1699   |
| rs9272957   | 6   | 32611152      | G/A     | 0.457 | HLA-DQA1       | 1.0273678  | 0.8187  | -0.165      | 9.52E-06 | 1.108         | 0.1698   |
| rs1064993   | 6   | 32611181      | G/A     | 0.458 | HLA-DQA1       | 1.0273678  | 0.819   | -0.165      | 9.69E-06 | 1.109         | 0.1692   |
| rs9273031   | 6   | 32611849      | A/C     | 0.457 | HLA-DQA1       | 1.02122205 | 0.8701  | -0.175      | 9.98E-06 | 1.151         | 0.1796   |
| rs9273036   | 6   | 32611898      | A/G     | 0.458 | HLA-DQA1       | 1.02122205 | 0.8658  | -0.176      | 9.59E-06 | 1.147         | 0.1813   |
| rs9273040   | 6   | 32611958      | C/G     | 0.455 | HLA-DQA1       | 1.02224378 | 0.86    | -0.177      | 9.45E-06 | 1.142         | 0.1851   |
| rs9273042   | 6   | 32611964      | C/T     | 0.454 | HLA-DQA1       | 1.02326654 | 0.8585  | -0.177      | 9.42E-06 | 1.145         | 0.1848   |
| rs9273044   | 6   | 32611971      | G/C     | 0.453 | HLA-DQA1       | 1.02326654 | 0.8581  | -0.177      | 9.48E-06 | 1.146         | 0.1845   |
| rs9273045   | 6   | 32611982      | A/C     | 0.453 | HLA-DQA1       | 1.02326654 | 0.8592  | -0.177      | 9.51E-06 | 1.146         | 0.1845   |
| rs9273048   | 6   | 32612008      | T/C     | 0.467 | HLA-DQA1       | 1.02531512 | 0.8477  | -0.185      | 7.35E-06 | 1.246         | 0.1634   |
| rs9273052   | 6   | 32612041      | A/G     | 0.466 | HLA-DQA1       | 1.02634095 | 0.8452  | -0.186      | 7.23E-06 | 1.246         | 0.164    |
| rs9273057   | 6   | 32612104      | C/T     | 0.441 | HLA-DQA1       | 1.03561971 | 0.7952  | -0.187      | 7.79E-06 | 1.21          | 0.1818   |
| rs9273059   | 6   | 32612111      | G/A     | 0.440 | HLA-DQA1       | 1.03561971 | 0.793   | -0.188      | 7.81E-06 | 1.208         | 0.1832   |
| rs9273062   | 6   | 32612161      | C/A     | 0.442 |                | 1.03458461 | 0.7968  | -0.187      | 7.83E-06 | 1.217         | 0.1788   |
| rs9273063   | 6   | 32612166      | C/T     | 0.442 |                | 1.03458461 | 0.7965  | -0.187      | 7.83E-06 | 1.217         | 0.1791   |
| rs9273070   | 6   | 32612241      | A/T     | 0.433 |                | 1.03665585 | 0.7928  | -0.189      | 7.75E-06 | 1.12          | 0.2217   |
| rs9273071   | 6   | 32612251      | T/G     | 0.432 |                | 1.03665585 | 0.7915  | -0.19       | 7.99E-06 | 1.116         | 0.2245   |

| rsID        | chr | hg19 position | REF/ALT | MAF   | Nearby gene(s) | Asthma     |         | Log10(IgE)  |          | Lung Function |         |
|-------------|-----|---------------|---------|-------|----------------|------------|---------|-------------|----------|---------------|---------|
|             |     |               |         |       |                | OR         | P value | Effect Size | P value  | Effect Size   | P value |
| rs9273073   | 6   | 32612279      | T/C     | 0.431 |                | 1.03665585 | 0.7904  | -0.19       | 7.93E-06 | 1.115         | 0.2252  |
| rs9273079   | 6   | 32612326      | C/T     | 0.432 |                | 1.03561971 | 0.7963  | -0.189      | 7.86E-06 | 1.113         | 0.2246  |
| rs6926894   | 6   | 32612430      | T/C     | 0.651 |                | 0.80815614 | 0.1945  | -0.235      | 4.15E-06 | 0.754         | 0.4965  |
| rs6926894   | 6   | 32612430      | T/C     | 0.651 |                | 0.80815614 | 0.1945  | -0.235      | 4.15E-06 | 0.754         | 0.4965  |
|             | 6   | 32612452      | A/AATGT | 0.504 |                | 1.09198812 | 0.5454  | -0.207      | 5.26E-06 | 1.232         | 0.211   |
| rs200930495 | 6   | 32612460      | G/A     | 0.420 |                | 1.04812201 | 0.7289  | -0.19       | 9.01E-06 | 1.123         | 0.2245  |
| rs9273093   | 6   | 32612514      | G/A     | 0.420 |                | 1.04917066 | 0.723   | -0.19       | 8.92E-06 | 1.132         | 0.2214  |
| rs9273102   | 6   | 32612566      | T/C     | 0.421 |                | 1.05022035 | 0.7236  | -0.192      | 8.43E-06 | 1.139         | 0.2225  |
| rs9273103   | 6   | 32612576      | G/C     | 0.421 |                | 1.05022035 | 0.7222  | -0.192      | 8.59E-06 | 1.141         | 0.2218  |
| rs9273104   | 6   | 32612595      | C/T     | 0.421 |                | 1.05022035 | 0.7231  | -0.192      | 8.52E-06 | 1.142         | 0.2217  |
| rs9273107   | 6   | 32612620      | A/G     | 0.421 |                | 1.04917066 | 0.7255  | -0.192      | 8.68E-06 | 1.146         | 0.2202  |
| rs9273108   | 6   | 32612626      | C/T     | 0.421 |                | 1.04917066 | 0.7255  | -0.192      | 8.74E-06 | 1.145         | 0.2206  |
| rs9273110   | 6   | 32612633      | G/C     | 0.422 |                | 1.04917066 | 0.7256  | -0.192      | 8.66E-06 | 1.144         | 0.221   |
| rs9273111   | 6   | 32612643      | G/A     | 0.422 |                | 1.04917066 | 0.7267  | -0.192      | 8.65E-06 | 1.144         | 0.221   |
|             | 6   | 32612747      | AC/A    | 0.423 |                | 1.04707441 | 0.7405  | -0.194      | 8.15E-06 | 1.168         | 0.2137  |
| rs9273127   | 6   | 32612762      | C/A     | 0.424 |                | 1.04602786 | 0.7444  | -0.194      | 7.78E-06 | 1.168         | 0.2131  |
| rs9273128   | 6   | 32612769      | G/C     | 0.425 |                | 1.04498235 | 0.7495  | -0.194      | 7.79E-06 | 1.171         | 0.2125  |
| rs9273129   | 6   | 32612774      | T/A     | 0.425 |                | 1.04498235 | 0.7494  | -0.194      | 7.79E-06 | 1.171         | 0.2126  |
| rs9273130   | 6   | 32612775      | G/A     | 0.425 |                | 1.04498235 | 0.7493  | -0.194      | 7.80E-06 | 1.171         | 0.2125  |
| rs9273148   | 6   | 32612982      | T/A     | 0.419 |                | 1.04812201 | 0.7343  | -0.213      | 6.89E-07 | 1.418         | 0.1286  |
| rs9273149   | 6   | 32612987      | G/A     | 0.446 |                | 1.04917066 | 0.7304  | -0.198      | 4.88E-06 | 1.268         | 0.1772  |
| rs9273154   | 6   | 32613028      | G/A     | 0.443 |                | 1.04917066 | 0.7269  | -0.198      | 4.98E-06 | 1.269         | 0.1764  |
| rs9273155   | 6   | 32613042      | A/C     | 0.441 |                | 1.04917066 | 0.7267  | -0.198      | 4.97E-06 | 1.264         | 0.1776  |
| rs9273157   | 6   | 32613052      | C/G     | 0.441 |                | 1.04917066 | 0.7259  | -0.198      | 4.96E-06 | 1.264         | 0.1778  |
| rs9273174   | 6   | 32613237      | A/G     | 0.464 |                | 1.0314855  | 0.826   | -0.203      | 3.56E-06 | 1.372         | 0.1479  |
|             | 6   | 32613360      | C/CA    | 0.397 |                | 1.07250818 | 0.6061  | -0.218      | 2.71E-07 | 1.358         | 0.1412  |
| rs9273187   | 6   | 32613376      | C/T     | 0.451 |                | 1.03873123 | 0.7826  | -0.197      | 4.45E-06 | 1.299         | 0.163   |
| rs74656013  | 6   | 32614037      | C/T     | 0.463 |                | 1.02020134 | 0.8825  | -0.193      | 3.97E-06 | 1.221         | 0.1777  |
| rs114430970 | 6   | 32614158      | G/A     | 0.398 |                | 1.07465534 | 0.5889  | -0.215      | 2.66E-07 | 1.395         | 0.1247  |
|             | 6   | 32614277      | T/A     | 0.454 |                | 1.03251751 | 0.8099  | -0.192      | 4.15E-06 | 1.186         | 0.1896  |
| rs17843590  | 6   | 32615850      | A/G     | 0.780 |                | 0.78348763 | 0.1308  | -0.227      | 6.38E-06 | 0.925         | 0.3965  |
|             | 6   | 32615853      | G/A     | 0.364 |                | 1.08328707 | 0.5678  | -0.213      | 1.26E-06 | 1.262         | 0.1867  |
| rs77770300  | 6   | 32615903      | A/G     | 0.534 |                | 0.9970045  | 0.9834  | -0.226      | 1.19E-06 | 1.419         | 0.1605  |
| rs28787299  | 6   | 32618811      | G/A     | 0.278 |                | 0.93426047 | 0.6973  | 0.248       | 5.54E-06 | -2.442        | 0.03872 |
| rs28575832  | 6   | 32619851      | T/C     | 0.702 |                | 0.8641577  | 0.4017  | -0.247      | 6.32E-06 | 2.025         | 0.08673 |
| rs28371182  | 6   | 32620255      | T/C     | 0.494 |                | 1.0030045  | 0.982   | -0.19       | 1.23E-06 | 1.329         | 0.1177  |
| rs28371183  | 6   | 32620256      | G/C     | 0.494 |                | 1.0030045  | 0.9824  | -0.19       | 1.23E-06 | 1.328         | 0.1178  |
| rs17843604  | 6   | 32620283      | C/T     | 0.703 |                | 0.84535383 | 0.164   | -0.182      | 1.37E-06 | 0.945         | 0.2482  |
| rs17612774  | 6   | 32620286      | T/C     | 0.702 |                | 0.84619961 | 0.1648  | -0.181      | 1.45E-06 | 0.942         | 0.2469  |
| rs41269976  | 6   | 32620549      | C/A     | 0.420 |                | 1.05337574 | 0.6549  | -0.182      | 4.77E-07 | 1.267         | 0.1061  |
| rs41269978  | 6   | 32620741      | A/C     | 0.417 |                | 1.05865581 | 0.6288  | -0.187      | 3.97E-07 | 1.294         | 0.1072  |
| rs17843654  | 6   | 32621378      | T/A     | 0.742 |                | 0.81383308 | 0.1524  | -0.212      | 2.23E-06 | 0.928         | 0.3407  |
| rs9273310   | 6   | 32622954      | G/A     | 0.280 |                | 1.02942459 | 0.852   | 0.229       | 1.70E-06 | -1.673        | 0.1069  |
| rs56435053  | 6   | 32623277      | C/T     | 0.418 |                | 1.0273678  | 0.82    | -0.191      | 1.64E-07 | 1.526         | 0.05444 |
| rs73732212  | 6   | 32623372      | A/G     | 0.659 |                | 0.87897397 | 0.2851  | -0.188      | 5.97E-07 | 1.171         | 0.1519  |
|             | 6   | 32624327      | G/T     | 0.205 |                | 1.01612869 | 0.9277  | 0.256       | 2.01E-06 | -1.922        | 0.09965 |
| rs4308604   | 6   | 32624618      | C/T     | 0.817 |                | 0.84874202 | 0.3135  | -0.23       | 6.51E-06 | 1.218         | 0.271   |
| rs28479136  | 6   | 32625051      | G/A     | 0.206 |                | 1.11182188 | 0.522   | 0.25        | 1.19E-06 | -2.003        | 0.0729  |
| rs28629976  | 6   | 32625221      | T/C     | 0.163 |                | 1.19124622 | 0.3182  | 0.254       | 3.93E-06 | -2.265        | 0.05692 |
| rs149503020 | 6   | 32625802      | T/G     | 0.161 |                | 1.13541702 | 0.4892  | 0.26        | 6.31E-06 | -1.725        | 0.1666  |
| rs6905775   | 6   | 32626021      | G/A     | 0.419 |                | 1.0273678  | 0.8209  | -0.191      | 1.62E-07 | 1.528         | 0.05427 |
| rs17205373  | 6   | 32626210      | C/G     | 0.240 |                | 1.05654061 | 0.6812  | 0.201       | 1.34E-06 | -1.478        | 0.1005  |
| rs9273363   | 6   | 32626272      | C/A     | 0.454 |                | 1.0030045  | 0.976   | -0.176      | 6.19E-07 | 1.138         | 0.1387  |
| rs9273364   | 6   | 32626302      | T/G     | 0.454 |                | 1.0030045  | 0.976   | -0.176      | 6.19E-07 | 1.138         | 0.1387  |
| rs9273366   | 6   | 32626382      | G/T     | 0.419 |                | 1.0273678  | 0.817   | -0.191      | 1.67E-07 | 1.527         | 0.0543  |
| rs9273367   | 6   | 32626438      | A/T     | 0.459 |                | 1.00400801 | 0.973   | -0.179      | 4.53E-07 | 1.169         | 0.1297  |
| rs9273368   | 6   | 32626475      | G/A     | 0.454 |                | 1.0030045  | 0.976   | -0.176      | 6.19E-07 | 1.138         | 0.1387  |
| rs9273371   | 6   | 32626565      | C/T     | 0.271 |                | 1.02122205 | 0.87    | 0.187       | 2.27E-06 | -1.737        | 0.04285 |
| rs9273386   | 6   | 32626977      | T/C     | 0.703 |                | 0.84704623 | 0.1711  | -0.192      | 3.45E-07 | 0.955         | 0.2447  |
| rs4713573   | 6   | 32626984      | A/C     | 0.268 |                | 1.04812201 | 0.7076  | 0.188       | 1.56E-06 | -1.455        | 0.08685 |
| rs9273390   | 6   | 32627042      | G/C     | 0.434 |                | 1.04498235 | 0.724   | -0.187      | 1.84E-06 | 1.211         | 0.1538  |
| rs9273391   | 6   | 32627043      | A/G     | 0.426 |                | 1.0273678  | 0.8328  | -0.189      | 1.39E-06 | 1.431         | 0.09264 |
| rs9273392   | 6   | 32627046      | C/A     | 0.438 |                | 1.02634095 | 0.8337  | -0.184      | 1.65E-06 | 1.454         | 0.08009 |
| rs9273393   | 6   | 32627050      | G/A     | 0.438 |                | 1.02634095 | 0.8337  | -0.184      | 1.65E-06 | 1.453         | 0.08017 |
| rs9273400   | 6   | 32627128      | C/T     | 0.700 |                | 0.8478937  | 0.1779  | -0.192      | 4.92E-07 | 0.946         | 0.2552  |

| rsID        | chr | hg19 position | REF/ALT | MAF   | Nearby gene(s) | Asthma     |         | Log10(IgE)  |          | Lung Function |          |
|-------------|-----|---------------|---------|-------|----------------|------------|---------|-------------|----------|---------------|----------|
|             |     |               |         |       |                | OR         | P value | Effect Size | P value  | Effect Size   | P value  |
| rs28724248  | 6   | 32629500      | C/A     | 0.355 | HLA-DQB1       | 1.05442965 | 0.7162  | -0.204      | 8.40E-06 | 1.286         | 0.1958   |
|             | 6   | 32630684      | C/T     | 0.559 | HLA-DQB1       | 0.82448197 | 0.2528  | -0.251      | 2.05E-06 | 0.987         | 0.3895   |
|             | 6   | 32630689      | T/C     | 0.559 | HLA-DQB1       | 0.82201223 | 0.2476  | -0.252      | 1.83E-06 | 0.98          | 0.3934   |
|             | 6   | 32630701      | C/T     | 0.559 | HLA-DQB1       | 0.82119063 | 0.2445  | -0.253      | 1.78E-06 | 0.981         | 0.3931   |
|             | 6   | 32630720      | C/T     | 0.576 | HLA-DQB1       | 0.82695913 | 0.2548  | -0.242      | 3.70E-06 | 1.161         | 0.3046   |
| rs9274199   | 6   | 32630721      | A/G     | 0.559 | HLA-DQB1       | 0.82036985 | 0.243   | -0.252      | 1.95E-06 | 0.964         | 0.4024   |
|             | 6   | 32630758      | G/A     | 0.573 | HLA-DQB1       | 0.83276816 | 0.2598  | -0.24       | 2.21E-06 | 1.017         | 0.3563   |
| rs368911972 | 6   | 32630784      | T/C     | 0.345 | HLA-DQB1       | 1.10738347 | 0.5431  | 0.241       | 3.83E-06 | -1.973        | 0.08033  |
|             | 6   | 32630920      | A/C     | 0.579 | HLA-DQB1       | 0.84282157 | 0.2983  | -0.238      | 3.52E-06 | 0.949         | 0.3937   |
|             | 6   | 32630968      | A/C     | 0.574 | HLA-DQB1       | 0.8504412  | 0.3295  | -0.235      | 5.92E-06 | 0.914         | 0.4162   |
|             | 6   | 32631372      | A/G     | 0.357 | HLA-DQB1       | 1.04498235 | 0.7689  | -0.221      | 1.84E-06 | 1.368         | 0.1729   |
|             | 6   | 32631458      | T/C     | 0.353 | HLA-DQB1       | 1.04707441 | 0.7602  | -0.222      | 1.87E-06 | 1.36          | 0.1785   |
| rs9274384   | 6   | 32632635      | A/C     | 0.337 | HLA-DQB1       | 1.11071061 | 0.4676  | 0.241       | 7.87E-08 | -1.901        | 0.05131  |
| rs1130386   | 6   | 32632650      | C/T     | 0.703 | HLA-DQB1       | 0.80734839 | 0.1076  | -0.197      | 1.95E-06 | 0.889         | 0.3223   |
|             | 6   | 32632659      | C/T     | 0.276 | HLA-DQB1       | 1.04393789 | 0.7756  | 0.214       | 4.26E-06 | -1.384        | 0.1706   |
| rs9274390   | 6   | 32632660      | T/G     | 0.280 | HLA-DQB1       | 1.04812201 | 0.7508  | 0.207       | 7.90E-06 | -1.33         | 0.1838   |
| rs1049082   | 6   | 32632744      | C/T     | 0.637 | HLA-DQB1       | 0.86675407 | 0.272   | -0.217      | 7.85E-08 | 1.114         | 0.2051   |
| rs1140310   | 6   | 32632783      | A/C     | 0.255 | HLA-DQB1       | 1.15257665 | 0.3039  | 0.205       | 1.87E-06 | -1.471        | 0.1152   |
| rs3830060   | 6   | 32633971      | A/G     | 0.412 | HLA-DQB1       | 1.04393789 | 0.7359  | -0.194      | 7.92E-07 | 1.44          | 0.09187  |
| rs9274695   | 6   | 32636997      | C/T     | 0.613 |                | 0.89404426 | 0.3538  | -0.194      | 2.28E-07 | 1.287         | 0.1146   |
| rs1794493   | 6   | 32639578      | A/G     | 0.661 |                | 0.87284263 | 0.2747  | -0.186      | 1.60E-06 | 0.82          | 0.3297   |
| rs9274901   | 6   | 32641213      | A/T     | 0.443 |                | 0.76490778 | 0.0907  | -0.257      | 1.82E-07 | 1.867         | 0.08214  |
| rs9274953   | 6   | 32641869      | G/A     | 0.562 |                | 0.87109869 | 0.3145  | -0.225      | 1.22E-07 | 1.061         | 0.2529   |
| rs9275160   | 6   | 32652620      | G/A     | 0.630 |                | 0.91851228 | 0.4628  | -0.192      | 9.56E-08 | 0.959         | 0.2212   |
| rs34100078  | 6   | 32653792      | A/G     | 0.205 |                | 1.1595129  | 0.2782  | 0.189       | 9.90E-06 | -1.42         | 0.1243   |
| rs3129713   | 6   | 32657255      | C/T     | 0.237 |                | 1.08112266 | 0.5403  | 0.186       | 3.26E-06 | -1.203        | 0.165    |
| rs3129715   | 6   | 32657281      | G/T     | 0.237 |                | 1.08112266 | 0.5393  | 0.186       | 3.28E-06 | -1.203        | 0.165    |
| rs9275208   | 6   | 32657722      | G/A     | 0.668 |                | 0.88161485 | 0.2886  | -0.174      | 2.52E-06 | 0.828         | 0.3013   |
| rs9275210   | 6   | 32657817      | C/T     | 0.668 |                | 0.88161485 | 0.2886  | -0.174      | 2.52E-06 | 0.828         | 0.3013   |
| rs7775228   | 6   | 32658079      | T/C     | 0.237 |                | 1.08112266 | 0.5447  | 0.186       | 3.27E-06 | -1.196        | 0.1682   |
| rs2157051   | 6   | 32658624      | G/A     | 0.711 |                | 0.8598477  | 0.2121  | -0.177      | 2.84E-06 | 0.841         | 0.3051   |
| rs9275215   | 6   | 32658677      | T/C     | 0.626 |                | 0.90302955 | 0.3792  | -0.191      | 1.06E-07 | 0.925         | 0.2369   |
| rs9275216   | 6   | 32658748      | A/T     | 0.626 |                | 0.90483742 | 0.3843  | -0.191      | 1.11E-07 | 0.917         | 0.2409   |
| rs9275218   | 6   | 32658933      | C/G     | 0.626 |                | 0.9066489  | 0.3966  | -0.19       | 1.22E-07 | 0.9           | 0.2501   |
| rs2858327   | 6   | 32658935      | A/G     | 0.238 |                | 1.09089668 | 0.4961  | 0.187       | 3.02E-06 | -1.093        | 0.2072   |
| rs9275222   | 6   | 32659516      | A/T     | 0.666 |                | 0.9012253  | 0.3748  | -0.163      | 8.42E-06 | 1.101         | 0.1635   |
| rs67838634  | 6   | 32662128      | A/G     | 0.666 |                | 0.90032452 | 0.3704  | -0.162      | 8.35E-06 | 1.11          | 0.1597   |
| rs17206147  | 6   | 32665311      | T/C     | 0.238 |                | 1.10849141 | 0.4279  | 0.194       | 1.64E-06 | -0.794        | 0.3654   |
| rs79876547  | 6   | 32669137      | T/C     | 0.238 |                | 1.11293425 | 0.4083  | 0.195       | 1.41E-06 | -0.761        | 0.3856   |
| rs76901383  | 6   | 32669817      | T/C     | 0.238 |                | 1.11293425 | 0.4083  | 0.195       | 1.41E-06 | -0.761        | 0.3856   |
| rs35406540  | 6   | 32670368      | A/G     | 0.238 |                | 1.11293425 | 0.4083  | 0.195       | 1.41E-06 | -0.761        | 0.3855   |
| rs66709408  | 6   | 32670414      | C/T     | 0.238 |                | 1.11293425 | 0.4083  | 0.195       | 1.41E-06 | -0.761        | 0.3856   |
| rs35120848  | 6   | 32670495      | C/T     | 0.238 |                | 1.11293425 | 0.4083  | 0.195       | 1.41E-06 | -0.761        | 0.3856   |
| rs13192471  | 6   | 32671103      | T/C     | 0.238 |                | 1.11293425 | 0.4083  | 0.195       | 1.41E-06 | -0.761        | 0.3856   |
| rs1794275   | 6   | 32671248      | G/A     | 0.246 |                | 1.13769012 | 0.3111  | 0.204       | 2.92E-07 | -0.991        | 0.252    |
| rs28451714  | 6   | 32671601      | G/T     | 0.238 |                | 1.11293425 | 0.4083  | 0.195       | 1.41E-06 | -0.761        | 0.3856   |
| rs77184128  | 6   | 32672135      | C/T     | 0.238 |                | 1.11293425 | 0.4083  | 0.195       | 1.41E-06 | -0.761        | 0.3856   |
| rs4568494   | 6   | 32672361      | A/G     | 0.238 |                | 1.11293425 | 0.4083  | 0.195       | 1.41E-06 | -0.761        | 0.3856   |
| rs35030589  | 6   | 32672903      | G/A     | 0.238 |                | 1.11293425 | 0.4083  | 0.195       | 1.41E-06 | -0.761        | 0.3856   |
| rs115580594 | 6   | 32673569      | A/G     | 0.238 |                | 1.11293425 | 0.4083  | 0.195       | 1.41E-06 | -0.761        | 0.3856   |
| rs9275511   | 6   | 32674329      | G/A     | 0.668 |                | 0.89673042 | 0.3541  | -0.169      | 3.96E-06 | 1.145         | 0.149    |
|             | 6   | 32677647      | C/T     | 0.674 |                | 0.876341   | 0.2679  | -0.173      | 3.72E-06 | 1.343         | 0.09676  |
| rs9275563   | 6   | 32677912      | C/T     | 0.666 |                | 0.87897397 | 0.2756  | -0.177      | 1.33E-06 | 0.73          | 0.3598   |
| rs2894281   | 6   | 32678424      | G/A     | 0.704 |                | 0.85299636 | 0.1943  | -0.169      | 9.16E-06 | 1.187         | 0.1509   |
| rs59779702  | 6   | 155020519     | T/A     | 0.084 |                | 0.92403992 | 0.7442  | -0.339      | 5.27E-06 | 0.6           | 0.7105   |
| rs13224192  | 7   | 4259953       | G/T     | 0.211 | SDK1           | 0.96464029 | 0.7992  | 0.003       | 0.9432   | -4.157        | 9.08E-06 |
| rs13224208  | 7   | 4259989       | G/C     | 0.228 | SDK1           | 0.93613086 | 0.6317  | 0.017       | 0.6911   | -4.069        | 8.47E-06 |
| rs641930    | 7   | 4264446       | G/C     | 0.228 | SDK1           | 0.93239382 | 0.6107  | 0.009       | 0.8426   | -4.107        | 6.22E-06 |
| rs614256    | 7   | 4266036       | T/C     | 0.208 | SDK1           | 0.95313379 | 0.723   | 0.005       | 0.916    | -4.065        | 7.43E-06 |
| rs611409    | 7   | 4266275       | A/G     | 0.207 | SDK1           | 0.95122942 | 0.715   | 0.004       | 0.9279   | -4.075        | 7.69E-06 |
| rs610962    | 7   | 4266379       | A/G     | 0.226 | SDK1           | 0.93332668 | 0.6057  | 0.015       | 0.7289   | -4.085        | 4.50E-06 |
| rs597636    | 7   | 4267072       | T/A     | 0.219 | SDK1           | 0.92588985 | 0.567   | 0.014       | 0.7481   | -3.969        | 9.82E-06 |
| rs688884    | 7   | 4268439       | A/G     | 0.226 | SDK1           | 0.92681621 | 0.5718  | 0.012       | 0.7683   | -4.032        | 6.16E-06 |
| rs678098    | 7   | 4268505       | C/T     | 0.226 | SDK1           | 0.92403992 | 0.5547  | 0.013       | 0.7534   | -4.039        | 6.03E-06 |
| rs662366    | 7   | 4270201       | T/A     | 0.225 | SDK1           | 0.91759423 | 0.5242  | 0.008       | 0.8574   | -4.021        | 6.58E-06 |

| rsID        | chr | hg19 position | REF/ALT | MAF   | Nearby gene(s) | Asthma     |          | Log10(IgE)  |          | Lung Function |          |
|-------------|-----|---------------|---------|-------|----------------|------------|----------|-------------|----------|---------------|----------|
|             |     |               |         |       |                | OR         | P value  | Effect Size | P value  | Effect Size   | P value  |
| rs660109    | 7   | 4270239       | T/A     | 0.224 | SDK1           | 0.92035115 | 0.5361   | 0.007       | 0.8666   | -4.015        | 6.69E-06 |
| rs647910    | 7   | 4270682       | A/G     | 0.225 | SDK1           | 0.92311635 | 0.55     | 0.006       | 0.8912   | -3.99         | 7.51E-06 |
| rs631530    | 7   | 4272488       | A/T     | 0.225 | SDK1           | 0.91210515 | 0.4955   | 0.006       | 0.8891   | -4.034        | 7.31E-06 |
| rs7800508   | 7   | 4280525       | T/C     | 0.257 | SDK1           | 0.93894347 | 0.6412   | -0.021      | 0.6157   | -4.401        | 8.68E-07 |
| rs4723527   | 7   | 4287120       | G/C     | 0.261 | SDK1           | 0.92035115 | 0.5445   | -0.025      | 0.5655   | -4.41         | 1.08E-06 |
| rs13241488  | 7   | 4310145       | G/C     | 0.179 |                | 1.03251751 | 0.8292   | 0.033       | 0.4749   | -4.384        | 6.49E-06 |
| rs10236881  | 7   | 4311029       | A/G     | 0.187 |                | 1.03977048 | 0.786    | 0.032       | 0.4783   | -4.322        | 5.86E-06 |
| rs10237163  | 7   | 4311316       | A/C     | 0.186 |                | 1.02020134 | 0.8902   | 0.033       | 0.4564   | -4.355        | 4.22E-06 |
| rs12701526  | 7   | 4312945       | G/A     | 0.180 |                | 1.03873123 | 0.7967   | 0.042       | 0.362    | -4.324        | 8.60E-06 |
| rs1542222   | 7   | 4313988       | G/A     | 0.183 |                | 1.03355054 | 0.8227   | 0.033       | 0.4765   | -4.412        | 5.52E-06 |
| rs13243377  | 7   | 4315442       | G/A     | 0.184 |                | 1.03355054 | 0.8212   | 0.037       | 0.4219   | -4.405        | 5.60E-06 |
| rs6963196   | 7   | 4320942       | A/G     | 0.702 |                | 1.1297541  | 0.3258   | -0.016      | 0.6812   | 3.792         | 4.60E-06 |
| rs6963217   | 7   | 4320984       | A/G     | 0.703 |                | 1.13088442 | 0.3219   | -0.016      | 0.6761   | 3.782         | 4.77E-06 |
| rs9639740   | 7   | 4321100       | A/G     | 0.702 |                | 1.1297541  | 0.3268   | -0.016      | 0.6766   | 3.781         | 4.69E-06 |
| rs6942784   | 7   | 4321177       | G/A     | 0.703 |                | 1.1297541  | 0.3235   | -0.017      | 0.6693   | 3.768         | 4.90E-06 |
| rs6963543   | 7   | 4321181       | A/C     | 0.703 |                | 1.13088442 | 0.3231   | -0.017      | 0.6664   | 3.763         | 4.99E-06 |
| rs4081585   | 7   | 4321255       | T/C     | 0.703 |                | 1.1297541  | 0.3234   | -0.017      | 0.6653   | 3.762         | 5.00E-06 |
| rs10259929  | 7   | 4321571       | A/G     | 0.703 |                | 1.1297541  | 0.323    | -0.017      | 0.6611   | 3.752         | 5.14E-06 |
| rs10277408  | 7   | 4322395       | G/T     | 0.708 |                | 1.15142465 | 0.262    | -0.012      | 0.7556   | 3.783         | 5.88E-06 |
| rs11769632  | 7   | 4322910       | A/G     | 0.703 |                | 1.14110832 | 0.2893   | -0.022      | 0.5762   | 3.739         | 6.49E-06 |
| rs11766159  | 7   | 4323068       | C/T     | 0.700 |                | 1.13428217 | 0.3139   | -0.028      | 0.484    | 3.812         | 4.82E-06 |
| rs10268536  | 7   | 4323741       | A/G     | 0.689 |                | 1.12862491 | 0.338    | -0.024      | 0.5446   | 3.876         | 3.60E-06 |
| rs10268540  | 7   | 4323762       | A/C     | 0.689 |                | 1.14339282 | 0.2859   | -0.026      | 0.5043   | 3.807         | 5.40E-06 |
| rs10268977  | 7   | 4324081       | A/G     | 0.697 |                | 1.13769012 | 0.3022   | -0.017      | 0.6588   | 3.779         | 5.80E-06 |
| rs11771523  | 7   | 4326782       | G/A     | 0.720 |                | 1.08220432 | 0.5386   | -0.053      | 0.192    | 3.834         | 7.28E-06 |
| rs73047621  | 7   | 4327070       | G/A     | 0.693 |                | 1.15719619 | 0.2473   | -0.016      | 0.6801   | 3.859         | 4.21E-06 |
| rs4720263   | 7   | 4423708       | T/G     | 0.301 |                | 0.74901221 | 0.0337   | 0.014       | 0.7386   | -4.064        | 8.23E-06 |
| rs3807588   | 7   | 5631403       | G/T     | 0.627 |                | 1.14110832 | 0.2523   | -0.074      | 0.0423   | 3.4           | 9.43E-06 |
|             | 7   | 32605171      | C/CA    | 0.899 |                | 0.78348763 | 0.3365   | 0.365       | 3.24E-06 | -0.751        | 0.6597   |
| rs1838914   | 8   | 135247131     | C/CT    | 0.458 |                | 0.9012253  | 0.3709   | 0.013       | 0.7222   | 3.439         | 8.09E-06 |
| rs9650120   | 8   | 135248058     | C/T     | 0.448 |                | 0.90032452 | 0.359    | 0.009       | 0.8112   | 3.424         | 6.45E-06 |
| rs9650120   | 8   | 135249414     | C/T     | 0.449 |                | 0.90302955 | 0.3655   | 0.008       | 0.8304   | 3.391         | 5.92E-06 |
| rs6996817   | 8   | 135249548     | T/C     | 0.458 |                | 0.90574271 | 0.3807   | 0.011       | 0.7501   | 3.5           | 2.90E-06 |
| rs966818    | 8   | 135251360     | A/G     | 0.459 |                | 0.91028276 | 0.4094   | 0.01        | 0.779    | 3.554         | 2.48E-06 |
|             | 8   | 135252054     | GAGA/G  | 0.449 |                | 0.8976276  | 0.3453   | 0.009       | 0.7987   | 3.483         | 4.01E-06 |
| rs2028939   | 8   | 135252366     | G/T     | 0.459 |                | 0.90937293 | 0.4053   | 0.011       | 0.7617   | 3.559         | 2.72E-06 |
| rs1579880   | 8   | 135252474     | C/G     | 0.459 |                | 0.90937293 | 0.4062   | 0.011       | 0.7596   | 3.565         | 2.67E-06 |
| rs1579882   | 8   | 135252730     | T/G     | 0.459 |                | 0.9111935  | 0.4157   | 0.011       | 0.7615   | 3.593         | 2.19E-06 |
| rs2028940   | 8   | 135252796     | A/G     | 0.459 |                | 0.9111935  | 0.415    | 0.011       | 0.7627   | 3.593         | 2.22E-06 |
| rs2028941   | 8   | 135253546     | C/A     | 0.459 |                | 0.9111935  | 0.4179   | 0.011       | 0.7549   | 3.613         | 2.10E-06 |
| rs2028942   | 8   | 135253675     | T/C     | 0.459 |                | 0.91210515 | 0.4227   | 0.011       | 0.7507   | 3.619         | 2.04E-06 |
|             | 8   | 135255086     | GT/G    | 0.459 |                | 0.91301771 | 0.4296   | 0.013       | 0.7241   | 3.67          | 1.72E-06 |
| rs6985458   | 8   | 135256192     | G/A     | 0.448 |                | 0.89493875 | 0.3401   | 0.012       | 0.7494   | 3.647         | 2.15E-06 |
| rs12542306  | 8   | 135256586     | C/T     | 0.442 |                | 0.89942465 | 0.3632   | 0.007       | 0.8566   | 3.607         | 2.94E-06 |
| rs4897702   | 8   | 135256931     | A/T     | 0.456 |                | 0.91028276 | 0.4218   | 0.014       | 0.6989   | 3.683         | 2.02E-06 |
|             | 8   | 135258019     | T/TG    | 0.454 |                | 0.91759423 | 0.4652   | 0.01        | 0.7883   | 3.687         | 2.09E-06 |
| rs1579876   | 8   | 135260420     | C/T     | 0.454 |                | 0.92496443 | 0.5104   | 0.014       | 0.7112   | 3.722         | 1.95E-06 |
| rs6471206   | 8   | 135261117     | A/G     | 0.453 |                | 0.92403992 | 0.5033   | 0.014       | 0.7049   | 3.737         | 1.88E-06 |
| rs7815222   | 8   | 135261158     | C/T     | 0.454 |                | 0.92681621 | 0.52     | 0.014       | 0.7014   | 3.732         | 1.90E-06 |
| rs4897703   | 8   | 135262846     | T/C     | 0.402 |                | 1.00601804 | 0.959    | -0.017      | 0.6513   | 3.723         | 1.62E-06 |
| rs4897704   | 8   | 135262880     | G/A     | 0.401 |                | 1.0030045  | 0.9784   | -0.017      | 0.6344   | 3.737         | 1.47E-06 |
| rs4897705   | 8   | 135263799     | T/C     | 0.391 |                | 0.99501248 | 0.9692   | -0.015      | 0.6864   | 3.605         | 4.10E-06 |
| rs1596945   | 8   | 135264827     | T/C     | 0.389 |                | 0.98609754 | 0.9063   | -0.01       | 0.7822   | 3.549         | 5.58E-06 |
|             | 8   | 135266631     | G/GTCAT | 0.389 |                | 0.99203191 | 0.9471   | -0.01       | 0.7881   | 3.556         | 5.50E-06 |
| rs1867948   | 8   | 135269198     | C/T     | 0.389 |                | 1.0030045  | 0.9783   | -0.008      | 0.8193   | 3.516         | 6.96E-06 |
|             | 8   | 145579950     | GA/AA   | 0.502 |                | 0.50763124 | 8.54E-06 | -0.017      | 0.7236   | 0.038         | 0.9709   |
| rs4993862   | 8   | 145579953     | T/A     | 0.502 | FBXL6          | 0.50763124 | 8.58E-06 | -0.017      | 0.724    | 0.039         | 0.9706   |
| rs4993862   | 8   | 145579954     | T/A     | 0.502 | FBXL6          | 0.50763124 | 8.58E-06 | -0.017      | 0.724    | 0.039         | 0.9706   |
| rs4993861   | 8   | 145579954     | G/A     | 0.502 | FBXL6          | 0.50763124 | 8.61E-06 | -0.017      | 0.7233   | 0.04          | 0.9693   |
| rs1566447   | 9   | 8376477       | C/T     | 0.094 | PTPRD          | 2.59607321 | 1.60E-06 | 0.045       | 0.4779   | 0.369         | 0.7863   |
| rs142585779 | 9   | 140239588     | C/T     | 0.102 | EXD3           | 0.39180148 | 7.89E-06 | -0.017      | 0.8014   | 0.271         | 0.8508   |
| rs2224985   | 10  | 44382946      | G/A     | 0.108 | LINC00840      | 0.87985338 | 0.4757   | 0.017       | 0.7576   | -5.298        | 9.01E-06 |
| rs10899938  | 10  | 44383053      | A/C     | 0.108 | LINC00840      | 0.88073367 | 0.476    | 0.017       | 0.7572   | -5.299        | 8.96E-06 |
| rs1460540   | 10  | 44384897      | C/A     | 0.103 | LINC00840      | 0.87022803 | 0.4543   | 0.014       | 0.8049   | -5.466        | 9.99E-06 |

| rsID        | chr | hg19 position | REF/ALT         | MAF   | Nearby gene(s) | Asthma     |          | Log10(IgE)  |          | Lung Function |          |
|-------------|-----|---------------|-----------------|-------|----------------|------------|----------|-------------|----------|---------------|----------|
|             |     |               |                 |       |                | OR         | P value  | Effect Size | P value  | Effect Size   | P value  |
| rs7097229   | 10  | 44385605      | T/G             | 0.107 | LINC00840      | 0.8824969  | 0.4868   | 0.019       | 0.7428   | -5.369        | 7.34E-06 |
| rs1947672   | 10  | 44386102      | A/G             | 0.107 | LINC00840      | 0.88337984 | 0.4898   | 0.019       | 0.7391   | -5.392        | 6.84E-06 |
| rs10899940  | 10  | 44388083      | C/G             | 0.103 | LINC00840      | 0.85129207 | 0.3879   | 0.016       | 0.7919   | -5.57         | 7.13E-06 |
| rs1325486   | 10  | 44388675      | C/A             | 0.107 | LINC00840      | 0.86588775 | 0.4227   | 0.02        | 0.7275   | -5.48         | 5.09E-06 |
| rs10899941  | 10  | 44390503      | G/C             | 0.102 | LINC00840      | 0.85470406 | 0.3998   | 0.016       | 0.7853   | -5.608        | 6.43E-06 |
| rs10899942  | 10  | 44390863      | G/A             | 0.102 | LINC00840      | 0.85470406 | 0.4008   | 0.016       | 0.7835   | -5.613        | 6.32E-06 |
| rs10899943  | 10  | 44391917      | A/G             | 0.106 |                | 0.87897397 | 0.4803   | 0.013       | 0.821    | -5.47         | 7.29E-06 |
|             | 10  | 44392165      | TA/T            | 0.108 |                | 0.86502229 | 0.4179   | 0.012       | 0.831    | -5.382        | 6.62E-06 |
| rs78212924  | 10  | 44392826      | C/T             | 0.099 |                | 0.87721777 | 0.4894   | 0.007       | 0.9021   | -5.734        | 5.68E-06 |
| rs117384395 | 12  | 20774642      | T/C             | 0.272 | PDE3A          | 1.08328707 | 0.5855   | -0.202      | 8.89E-06 | 0.335         | 0.7348   |
| rs4765590   | 12  | 125115891     | A/G             | 0.376 |                | 1.03977048 | 0.7306   | -0.018      | 0.621    | 3.471         | 4.65E-06 |
| rs10846693  | 12  | 125116474     | G/A             | 0.377 |                | 1.03458461 | 0.7612   | -0.015      | 0.6826   | 3.525         | 2.81E-06 |
| rs4765591   | 12  | 125118479     | C/T             | 0.316 |                | 0.94648515 | 0.6547   | -0.005      | 0.8988   | 3.595         | 9.69E-06 |
| rs12369888  | 12  | 125120537     | C/T             | 0.383 |                | 1.03251751 | 0.7818   | -0.024      | 0.5025   | 3.742         | 9.03E-07 |
| rs12371000  | 12  | 125121037     | G/T             | 0.377 |                | 1.04812201 | 0.6796   | -0.017      | 0.6346   | 3.573         | 2.32E-06 |
| rs56095799  | 12  | 125122377     | G/A             | 0.365 |                | 1.059715   | 0.6161   | -0.026      | 0.4856   | 3.681         | 1.85E-06 |
| rs1193394   | 12  | 128810511     | G/A             | 0.371 | TMEM132C       | 0.85470406 | 0.3043   | 0.213       | 8.06E-06 | -0.128        | 0.9015   |
| rs61995582  | 14  | 21034836      | G/A             | 0.307 |                | 0.92311635 | 0.5247   | -0.18       | 4.12E-06 | 1.024         | 0.2264   |
| rs7141747   | 14  | 21050921      | T/C             | 0.370 |                | 1          | 0.9996   | -0.167      | 6.48E-06 | -0.164        | 0.8383   |
| rs1364089   | 16  | 66154187      | G/A             | 0.085 |                | 0.93426047 | 0.737    | -0.297      | 2.83E-06 | 0.315         | 0.8193   |
| rs9926258   | 16  | 66154429      | A/C             | 0.094 |                | 0.94270677 | 0.7531   | -0.275      | 2.96E-06 | 0.711         | 0.578    |
| rs9926420   | 16  | 66154575      | A/T             | 0.095 |                | 0.9540874  | 0.8016   | -0.271      | 3.53E-06 | 0.743         | 0.5584   |
| rs9926714   | 16  | 66154700      | G/T             | 0.095 |                | 0.95599748 | 0.8102   | -0.271      | 3.34E-06 | 0.745         | 0.5567   |
| rs28547342  | 16  | 66155010      | G/A             | 0.094 |                | 0.96850658 | 0.8637   | -0.268      | 5.38E-06 | 0.663         | 0.6039   |
| rs8060523   | 16  | 66155081      | T/C             | 0.094 |                | 0.96464029 | 0.8496   | -0.267      | 5.78E-06 | 0.831         | 0.5153   |
|             | 16  | 66155168      | TGAGAGAGA/TGAGA | 0.093 |                | 0.97726248 | 0.9021   | -0.264      | 9.20E-06 | 0.734         | 0.5696   |
| rs11657565  | 17  | 1848100       | A/C             | 0.097 | RTN4RL1        | 0.96947557 | 0.8686   | 0.261       | 8.63E-06 | 1.242         | 0.329    |
| rs115135057 | 17  | 1850269       | G/C             | 0.097 | RTN4RL1        | 0.96850658 | 0.867    | 0.262       | 8.81E-06 | 1.237         | 0.332    |
|             | 17  | 1850271       | A/ATG           | 0.097 |                | 0.96850658 | 0.8666   | 0.262       | 8.81E-06 | 1.237         | 0.3321   |
|             | 17  | 1850329       | T/G             | 0.096 | RTN4RL1        | 0.95791139 | 0.8236   | 0.263       | 8.48E-06 | 1.235         | 0.335    |
| rs10438728  | 17  | 1859515       | C/G             | 0.103 | RTN4RL1        | 0.91301771 | 0.6148   | 0.248       | 9.90E-06 | 0.658         | 0.5889   |
| rs10438742  | 17  | 1859530       | T/C             | 0.103 | RTN4RL1        | 0.91210515 | 0.613    | 0.248       | 9.85E-06 | 0.656         | 0.5901   |
|             | 17  | 1860032       | CTTTT/C         | 0.161 |                | 0.97530991 | 0.8821   | 0.246       | 2.92E-06 | 0.536         | 0.6396   |
|             | 18  | 45894340      | G/GA            | 0.178 |                | 0.5020779  | 9.69E-06 | -0.046      | 0.358    | -0.344        | 0.7473   |
| rs148980742 | 18  | 45912924      | A/G             | 0.069 | ZBTB7C         | 0.3756866  | 9.32E-06 | -0.125      | 0.07786  | -1.277        | 0.4009   |
| rs34196188  | 18  | 57456258      | T/A             | 0.260 |                | 1.0512711  | 0.7325   | -0.201      | 9.36E-06 | 1.794         | 0.06735  |
| rs35456671  | 18  | 57456271      | A/G             | 0.257 |                | 1.09198812 | 0.5439   | -0.2        | 9.62E-06 | 1.741         | 0.0758   |
| rs57018922  | 18  | 57456346      | G/C             | 0.256 |                | 1.09308066 | 0.5421   | -0.201      | 8.93E-06 | 1.737         | 0.0767   |
| rs4798975   | 18  | 76431563      | G/A             | 0.695 |                | 1.00803209 | 0.9511   | 0.186       | 7.24E-06 | -1.059        | 0.2394   |
|             | 19  | 4160737       | C/CT            | 0.451 |                | 0.88337984 | 0.4919   | -0.033      | 0.5591   | -5.995        | 5.74E-07 |
| rs168423    | 19  | 4170468       | G/A             | 0.474 | CREB3L3        | 0.94932887 | 0.6777   | -0.003      | 0.9403   | -3.833        | 3.67E-06 |
|             | 19  | 4170920       | A/AAATG         | 0.478 |                | 0.9665715  | 0.7824   | 0.001       | 0.9821   | -3.79         | 4.24E-06 |
|             | 19  | 56085686      | C/CA            | 0.454 |                | 1.03873123 | 0.7517   | -0.021      | 0.5865   | 3.67          | 5.17E-06 |
| rs12151142  | 19  | 56086584      | T/C             | 0.458 |                | 1.06715902 | 0.5793   | -0.03       | 0.4119   | 3.551         | 5.50E-06 |
| rs28373821  | 19  | 56087079      | G/A             | 0.458 |                | 1.06822672 | 0.5712   | -0.03       | 0.417    | 3.551         | 5.32E-06 |
| rs77509162  | 19  | 56091899      | G/A             | 0.249 | ZNF579         | 1.08328707 | 0.5573   | -0.02       | 0.6399   | 4.757         | 1.39E-07 |
| rs58751607  | 19  | 56120284      | T/C             | 0.258 | ZNF865         | 1.04917066 | 0.7289   | 0.008       | 0.8585   | 4.405         | 2.19E-06 |
| rs10411244  | 19  | 56140677      | A/C             | 0.356 |                | 1.06822672 | 0.6046   | 0.004       | 0.914    | 3.857         | 5.64E-06 |
| rs186981222 | 19  | 56149601      | G/C             | 0.297 | ZNF580         | 1.02326654 | 0.8563   | 0.015       | 0.7093   | 3.836         | 4.65E-06 |
| rs75498600  | 19  | 56151704      | G/A             | 0.295 | ZNF580         | 1.01816298 | 0.8887   | 0.014       | 0.7267   | 3.883         | 3.64E-06 |
| rs3760701   | 19  | 56152115      | G/A             | 0.306 | ZNF580         | 1.05022035 | 0.6965   | 0.012       | 0.7694   | 3.893         | 3.03E-06 |
| rs34834404  | 19  | 56190645      | G/A             | 0.314 | EPN1           | 1.05759768 | 0.6632   | 0.02        | 0.6202   | 4.059         | 2.50E-06 |
| rs12985023  | 19  | 56202754      | C/T             | 0.325 | EPN1           | 0.96367614 | 0.7807   | 0.004       | 0.9158   | 3.984         | 5.81E-06 |
| rs73622659  | 20  | 44838624      | G/C             | 0.317 | CDH22          | 0.96560542 | 0.7856   | -0.022      | 0.5855   | -3.856        | 8.56E-06 |
|             | 20  | 60495165      | T/TTGTG         | 0.407 |                | 1.1040663  | 0.6242   | -0.28       | 7.60E-06 | 2.456         | 0.07062  |





**Supplementary Table 5:** GTEx significant transcripts ( $q \leq 0.05$ ) within 1Mb region of peak GWAS SNPs associated with lung function and IgE in Lung and Whole blood tissues. The PP3 and PP4 from the colocalization for each gene in included in brackets after the gene name.

| Phenotype     | SNP       | Region (Chr:Start-End) |      | Lung Tissue                                                                                                                                                                                                                                                                                                                                                                                                                                                                                                                                                                                                                                                                                                                                                                                                                                                                                                                                                                                                                                                                                                                                                                                                                                                                                                                                     |      | Whole Blood                                                                                                                                                                                                                                                                                                                                                                                                                                                                                                                                                                                                                                                                                                                                                                                                                                                                                                                                                                                                                                                                                                                                                                                                       |
|---------------|-----------|------------------------|------|-------------------------------------------------------------------------------------------------------------------------------------------------------------------------------------------------------------------------------------------------------------------------------------------------------------------------------------------------------------------------------------------------------------------------------------------------------------------------------------------------------------------------------------------------------------------------------------------------------------------------------------------------------------------------------------------------------------------------------------------------------------------------------------------------------------------------------------------------------------------------------------------------------------------------------------------------------------------------------------------------------------------------------------------------------------------------------------------------------------------------------------------------------------------------------------------------------------------------------------------------------------------------------------------------------------------------------------------------|------|-------------------------------------------------------------------------------------------------------------------------------------------------------------------------------------------------------------------------------------------------------------------------------------------------------------------------------------------------------------------------------------------------------------------------------------------------------------------------------------------------------------------------------------------------------------------------------------------------------------------------------------------------------------------------------------------------------------------------------------------------------------------------------------------------------------------------------------------------------------------------------------------------------------------------------------------------------------------------------------------------------------------------------------------------------------------------------------------------------------------------------------------------------------------------------------------------------------------|
| Lung function | rs4410198 | 19:55122538-57122538   | n=37 | <p><i>KIR3DL1</i>(1/0), <i>KIR2DS4</i>(1/0), <i>KIR3DL2</i>(1/0), <i>NLRP2</i>(1/0), <i>CTC-550B14.7</i>(1/0), <i>RDH13</i>(1/0), <i>EPS8L1</i>(1/0), <i>SUV420H2</i>(1/0), <i>TMEM190</i>(1/0), <i>RPL28</i>(1/0), <i>SSCS5D</i>(1/0), <i>ZNF582-AS1</i>(1/0), <i>ZNF667</i>(1/0), <i>ZNF667-AS1</i>(1/0), <i>ZFP28</i>(1/0), <i>AC007228.11</i>(1/0), <i>ZNF470</i>(1/0), <i>ZNF580</i>(1/0), <i>KIR2DL1</i>(1/0), <i>ZNF71</i>(1/0), <i>TMEM86B</i>(0.96/0), <i>LILRB1</i>(0.95/0), <i>LILRB4</i>(0.83/0.01), <i>NAT14</i>(0.77/0.01), <i>COX6B2</i>(0.71/0.04), <i>ISOC2</i>(0.7/0.01), <i>IL11</i>(0.67/0.01), <i>DNAAF3</i>(0.52/0.03), <i>ZNF542</i>(0.51/0.2), <i>TNNT1</i>(0.44/0.02), <i>CTD-253719.12</i>(0.42/0.02), <i>KIR2DL3</i>(0.32/0.05), <i>CTD-2105E13.13</i>(0.32/0.08), <i>FCAR</i>(0.31/0.03), <i>EPN1</i>(0.25/0.13), <i>ZNF579</i>(0.21/0.53), <b><i>CTD-253719.5</i>(0.02/0.98)</b></p>                                                                                                                                                                                                                                                                                                                                                                                                                               | n=30 | <p><i>KIR3DL1</i>(1/0), <i>KIR2DP1</i>(1/0), <i>KIR2DL1</i>(1/0), <i>KIR2DS4</i>(1/0), <i>KIR3DL2</i>(1/0), <i>NCR1</i>(1/0), <i>NLRP2</i>(1/0), <i>CTC-550B14.7</i>(1/0), <i>RDH13</i>(1/0), <i>TNNT1</i>(1/0), <i>COX6B2</i>(1/0), <i>RPL28</i>(1/0), <i>ZNF582-AS1</i>(1/0), <i>ZFP28</i>(1/0), <i>KIR2DL3</i>(0.99/0), <i>CTB-61M7.2</i>(0.99/0), <i>AC007228.11</i>(0.99/0), <i>SSCS5D</i>(0.96/0), <i>ZNF470</i>(0.95/0), <i>EPS8L1</i>(0.77/0.01), <i>TMEM86B</i>(0.76/0.01), <i>FCAR</i>(0.71/0.02), <i>TMEM150B</i>(0.58/0.02), <i>AC010327.2</i>(0.58/0.02), <i>ZNF835</i>(0.52/0.03), <i>ZNF71</i>(0.38/0.33), <i>EPN1</i>(0.26/0.04), <i>CTC-550B14.8</i>(0.25/0.04), <i>AC011515.2</i>(0.14/0.05), <i>LAIR1</i>(0.05/0.03)</p>                                                                                                                                                                                                                                                                                                                                                                                                                                                                       |
| IgE           | rs3135348 | 6:31394098-33394098    | n=57 | <p><i>MICB</i>(1/0), <i>ATP6V1G2</i>(1/0), <i>LY6G5B</i>(1/0), <i>LY6G5C</i>(1/0), <i>C6orf48</i>(1/0), <i>SKIV2L</i>(1/0), <i>C4A</i>(1/0), <i>CYP21A1P</i>(1/0), <i>TNXA</i>(1/0), <i>STK19P</i>(1/0), <i>ATF6B</i>(1/0), <i>RNF5</i>(1/0), <i>NOTCH4</i>(1/0), <i>HCG23</i>(1/0), <i>HLA-DRB5</i>(1/0), <i>HLA-DQB1</i>(1/0), <i>HLA-DQB1-AS1</i>(1/0), <i>XXbac-BPG254F23.6</i>(1/0), <i>HLA-DQA2</i>(1/0), <i>HLA-DQB2</i>(1/0), <i>HLA-DOB</i>(1/0), <i>TAP2</i>(1/0), <i>PSMB9</i>(1/0), <i>HLA-DPA1</i>(1/0), <i>HSD17B8</i>(1/0), <i>DAXX</i>(1/0), <i>PRRC2A</i>(1/0), <i>BAG6</i>(1/0), <i>RPL32P1</i>(1/0), <i>HLA-DPB2</i>(1/0), <i>HLA-DOA</i>(1/0), <i>TAPBP</i>(1/0), <i>C4B</i>(1/0), <i>HLA-DRB6</i>(0.99/0.01), <i>RPS18</i>(0.99/0), <i>DDAH2</i>(0.99/0), <i>COL11A2</i>(0.98/0), <i>CYP21A2</i>(0.98/0.01), <i>HLA-DRB1</i>(0.98/0.02), <i>ZBTB22</i>(0.98/0), <i>NELFE</i>(0.97/0), <i>HLA-DPB1</i>(0.97/0), <i>AIF1</i>(0.96/0.01), <i>CSNK2B</i>(0.95/0), <i>ABHD16A</i>(0.93/0.01), <i>HLA-DRB9</i>(0.9/0.1), <i>HLA-DQA1</i>(0.77/0.23), <i>DXO</i>(0.73/0.03), <i>XXbac-BPG154L12.4</i>(0.71/0.25), <i>RING1</i>(0.67/0.01), <i>ZBTB12</i>(0.6/0.02), <i>PPP1R2P1</i>(0.58/0.02), <i>DDX39B</i>(0.53/0.02), <i>AGER</i>(0.52/0.05), <i>STK19</i>(0.47/0.02), <i>PSMB8</i>(0.47/0.02), <i>B3GALT4</i>(0.44/0.03)</p> | n=51 | <p><i>MICB</i>(1/0), <i>DDX39B</i>(1/0), <i>PRRC2A</i>(1/0), <i>LY6G5B</i>(1/0), <i>LY6G5C</i>(1/0), <i>C6orf48</i>(1/0), <i>SKIV2L</i>(1/0), <i>C4A</i>(1/0), <i>CYP21A1P</i>(1/0), <i>C4B</i>(1/0), <i>PBX2</i>(1/0), <i>HLA-DRB5</i>(1/0), <i>HLA-DQB1</i>(1/0), <i>HLA-DQB1-AS1</i>(1/0), <i>HLA-DQB2</i>(1/0), <i>HLA-DOB</i>(1/0), <i>TAP2</i>(1/0), <i>PSMB9</i>(1/0), <i>RPS18</i>(1/0), <i>AIF1</i>(1/0), <i>CYP21A2</i>(1/0), <i>HLA-DQA1</i>(1/0), <i>HLA-DPB2</i>(1/0), <i>ATP6V1G2</i>(1/0), <i>DAXX</i>(1/0), <i>HLA-DOA</i>(0.99/0), <i>HLA-DRB1</i>(0.99/0.01), <i>C2</i>(0.99/0), <i>HLA-DRB6</i>(0.99/0.01), <i>TAP1</i>(0.99/0), <i>HLA-DRB9</i>(0.98/0.02), <i>HLA-DQA2</i>(0.98/0.02), <i>HSD17B8</i>(0.98/0), <i>RPL32P1</i>(0.97/0), <i>CSNK2B</i>(0.85/0.02), <i>PSMB8</i>(0.84/0.01), <i>AGER</i>(0.84/0.01), <i>FKBPL</i>(0.8/0.1), <i>BAG6</i>(0.78/0.1), <i>DDAH2</i>(0.78/0.02), <i>NCR3</i>(0.78/0.03), <i>HLA-DPB1</i>(0.77/0.01), <i>STK19</i>(0.66/0.03), <i>CLIC1</i>(0.63/0.02), <i>SLC44A4</i>(0.62/0.02), <i>HLA-DMA</i>(0.59/0.02), <i>HLA-DRA</i>(0.55/0.03), <i>HLA-DPA1</i>(0.53/0.03), <i>TAPSAR1</i>(0.52/0.03), <i>COL11A2</i>(0.48/0.02), <i>RNF5</i>(0.44/0.03)</p> |

**Supplementary Table 6:** MHC Class I and II Genes and HLA that were imputed in these data. 14 alleles with a frequency  $\geq 5\%$  were tested individually for the three primary phenotypes .

| Gene/Haplotype | Allele/Haplotype | Frequency      |        |
|----------------|------------------|----------------|--------|
| HLA-C          | HLA-C*04:01      | 27.52%         |        |
|                | HLA-C*01:02      | 16.87%         |        |
|                | HLA-C*07:02      | 12.66%         |        |
|                | HLA-C*03:04      | 10.58%         |        |
|                | HLA-C*15:02      | 6.50%          |        |
|                | HLA-C*08:01      | 4.36%          |        |
|                | HLA-C*07:01      | 4.22%          |        |
|                | HLA-C*08:02      | 3.18%          |        |
|                | HLA-C*08:03      | 2.70%          |        |
|                | HLA-C*06:02      | 2.49%          |        |
|                | HLA-C*05:01      | 1.87%          |        |
|                | HLA-C*16:01      | 1.87%          |        |
|                | HLA-C*03:03      | 1.24%          |        |
|                | HLA-C*12:03      | 0.97%          |        |
|                | HLA-C*17:01      | 0.76%          |        |
|                | HLA-C*02:02      | 0.62%          |        |
|                | HLA-C*15:05      | 0.55%          |        |
|                | HLA-C*12:02      | 0.35%          |        |
|                | HLA-C*14:02      | 0.28%          |        |
|                | HLA-C*16:02      | 0.21%          |        |
| HLA-C*03:02    | 0.14%            |                |        |
| HLA-C*16:04    | 0.07%            |                |        |
| HLA-DQA1       | HLA-DQA1*03:01   | 20.30%         |        |
|                | HLA-DQA1*03:02   | 19.62%         |        |
|                | HLA-DQA1*04:01   | 19.34%         |        |
|                | HLA-DQA1*05:03   | 12.69%         |        |
|                | HLA-DQA1*05:05   | 7.48%          |        |
|                | HLA-DQA1*02:01   | 4.39%          |        |
|                | HLA-DQA1*01:02   | 3.98%          |        |
|                | HLA-DQA1*05:01   | 3.64%          |        |
|                | HLA-DQA1*01:01   | 3.29%          |        |
|                | HLA-DQA1*03:03   | 2.06%          |        |
|                | HLA-DQA1*01:03   | 1.65%          |        |
|                | HLA-DQA1*01:05   | 0.75%          |        |
|                | HLA-DQA1*01:04   | 0.62%          |        |
|                | HLA-DQA1*06:01   | 0.21%          |        |
|                |                  | HLA-DQB1*03:02 | 21.38% |
|                |                  | HLA-DQB1*03:01 | 20.64% |
| HLA-DQB1*03:03 |                  | 19.82%         |        |
| HLA-DQB1*04:02 |                  | 19.69%         |        |

| Gene/Haplotype | Allele/Haplotype | Frequency   |
|----------------|------------------|-------------|
| HLA-DQB1       | HLA-DQB1*05:01   | 4.19%       |
|                | HLA-DQB1*02:02   | 3.99%       |
|                | HLA-DQB1*02:01   | 3.65%       |
|                | HLA-DQB1*06:02   | 2.37%       |
|                | HLA-DQB1*06:03   | 1.35%       |
|                | HLA-DQB1*05:03   | 0.81%       |
|                | HLA-DQB1*06:04   | 0.54%       |
|                | HLA-DQB1*06:09   | 0.47%       |
|                | HLA-DQB1*05:02   | 0.41%       |
|                | HLA-DQB1*03:19   | 0.34%       |
|                | HLA-DQB1*06:01   | 0.27%       |
|                | HLA-DQB1*04:01   | 0.07%       |
|                | DQA1~DQB1        | 03.01~03.02 |
| 03.02~03.03    |                  | 19.34%      |
| 04.01~04.02    |                  | 19.06%      |
| 05.03~03.01    |                  | 12.80%      |
| 05.05~03.01    |                  | 7.03%       |
| 02.01~02.02    |                  | 3.66%       |
| 05.01~02.01    |                  | 3.66%       |
| 01.01~05.01    |                  | 3.31%       |
| 01.02~06.02    |                  | 2.32%       |
| 01.03~06.03    |                  | 1.41%       |
| 01.05~05.01    |                  | 0.77%       |
| 03.03~04.02    |                  | 0.77%       |
| 01.04~05.03    |                  | 0.63%       |
| 03.03~03.01    |                  | 0.63%       |
| 02.01~03.03    |                  | 0.56%       |
| 01.02~06.04    |                  | 0.49%       |
| 01.02~06.09    |                  | 0.49%       |
| 01.02~05.02    |                  | 0.42%       |
| 03.02~03.02    |                  | 0.42%       |
| 05.05~03.19    |                  | 0.35%       |
| 01.03~06.01    |                  | 0.28%       |
| 03.03~02.02    |                  | 0.28%       |
| 03.03~03.02    |                  | 0.28%       |
| 06.01~03.01    |                  | 0.21%       |
| 04.01~03.02    |                  | 0.14%       |
| 01.02~05.01    |                  | 0.07%       |
| 02.01~02.01    |                  | 0.07%       |
| 03.03~03.03    |                  | 0.07%       |
| 03.03~04.01    | 0.07%            |             |
| 05.03~03.02    | 0.07%            |             |

**Supplementary Table 7: Results of the 14 HLA alleles tested individually for the three primary phenotypes: Asthma, IgE, and lung function.**

| HLA Gene*Allele                                                      | Frequency  | Asthma (HIBAG) |               | Log10(IgE)    |                 | Lung function |               | Log10(IgE) cases |               | Log10(IgE) controls |               | Lung function cases |               | Lung function controls |               |
|----------------------------------------------------------------------|------------|----------------|---------------|---------------|-----------------|---------------|---------------|------------------|---------------|---------------------|---------------|---------------------|---------------|------------------------|---------------|
|                                                                      |            | OR             | P value       | Beta          | P value         | Beta          | P value       | Beta             | P value       | Beta                | P value       | Beta                | P value       | Beta                   | P value       |
| HLA-C*04:01                                                          | 24%        | 0.8            | 0.1155        | -0.110        | 0.0055          | 1.012         | 0.2337        | -0.120           | 0.0193        | -0.099              | 0.1136        | 1.369               | 0.2617        | 0.413                  | 0.7262        |
| HLA-C*01:02                                                          | 16%        | 1.1            | 0.4817        | -0.067        | 0.1640          | 0.355         | 0.7306        | -0.094           | 0.0989        | -0.019              | 0.8230        | 1.273               | 0.3449        | -0.898                 | 0.5816        |
| HLA-C*03:04                                                          | 10%        | 1.3            | 0.1473        | -0.021        | 0.7058          | 0.552         | 0.6485        | 0.041            | 0.5426        | -0.110              | 0.2855        | 0.148               | 0.9251        | 1.594                  | 0.4123        |
| HLA-C*07:02                                                          | 12%        | 1.0            | 0.8604        | 0.123         | 0.0194          | -1.014        | 0.3712        | 0.107            | 0.0903        | 0.145               | 0.1131        | -1.560              | 0.3031        | -0.155                 | 0.9287        |
| HLA-C*15:02                                                          | 6%         | 0.9            | 0.7993        | 0.002         | 0.9776          | 0.264         | 0.8679        | -0.067           | 0.4508        | 0.121               | 0.3415        | 0.089               | 0.9669        | 0.182                  | 0.9395        |
| HLA-DQA1*03:01                                                       | 18%        | 1.0            | 0.9095        | -0.142        | 0.0012          | 2.760         | 0.0035        | -0.129           | 0.0145        | -0.170              | 0.0273        | 3.876               | 0.0019        | 0.942                  | 0.5218        |
| HLA-DQA1*03:02                                                       | 18%        | 1.1            | 0.7074        | -0.105        | 0.0213          | -1.283        | 0.1897        | -0.101           | 0.0642        | -0.094              | 0.2404        | -2.819              | 0.0298        | 1.380                  | 0.3613        |
| <b>HLA-DQA1*04:01</b>                                                | <b>17%</b> | <b>1.1</b>     | <b>0.4380</b> | <b>0.180</b>  | <b>4.47E-05</b> | <b>-1.528</b> | <b>0.1090</b> | <b>0.142</b>     | <b>0.0082</b> | <b>0.209</b>        | <b>0.0063</b> | <b>-1.384</b>       | <b>0.2783</b> | <b>-2.026</b>          | <b>0.1643</b> |
| HLA-DQA1*05:03                                                       | 12%        | 0.6            | 0.0021        | -0.073        | 0.1658          | 0.284         | 0.8033        | -0.139           | 0.0495        | -0.010              | 0.8969        | 2.054               | 0.2226        | -1.346                 | 0.3790        |
| HLA-DQA1*05:05                                                       | 7%         | 1.4            | 0.1464        | 0.085         | 0.1994          | -0.380        | 0.7908        | 0.069            | 0.3785        | 0.159               | 0.1860        | -2.015              | 0.2794        | 2.392                  | 0.2978        |
| <b>HLA-DQB1*03:02</b>                                                | <b>19%</b> | <b>1.0</b>     | <b>0.7044</b> | <b>-0.158</b> | <b>2.13E-04</b> | <b>2.366</b>  | <b>0.0100</b> | <b>-0.130</b>    | <b>0.0123</b> | <b>-0.205</b>       | <b>0.0054</b> | <b>3.625</b>        | <b>0.0032</b> | <b>0.431</b>           | <b>0.7594</b> |
| HLA-DQB1*03:01                                                       | 19%        | 0.8            | 0.1309        | -0.029        | 0.4956          | -0.246        | 0.7911        | -0.075           | 0.1706        | 0.043               | 0.5410        | -0.230              | 0.8595        | -0.299                 | 0.8219        |
| HLA-DQB1*03:03                                                       | 18%        | 1.1            | 0.4899        | -0.097        | 0.0332          | -0.909        | 0.3519        | -0.094           | 0.0874        | -0.090              | 0.2568        | -2.475              | 0.0577        | 1.698                  | 0.2562        |
| <b>HLA-DQB1*04:02</b>                                                | <b>18%</b> | <b>1.1</b>     | <b>0.3255</b> | <b>0.178</b>  | <b>4.34E-05</b> | <b>-1.176</b> | <b>0.2097</b> | <b>0.121</b>     | <b>0.0201</b> | <b>0.239</b>        | <b>0.0017</b> | <b>-1.092</b>       | <b>0.3792</b> | <b>-1.592</b>          | <b>0.2745</b> |
| <b>HLA DQA1~DQB1 Haplotype</b>                                       |            |                |               |               |                 |               |               |                  |               |                     |               |                     |               |                        |               |
| 03.01~03.02                                                          | 20%        | 1.0            | 0.9712        | -0.140        | 0.0016          | 2.769         | 0.0037        | -0.123           | 0.0209        | -0.172              | 0.0273        | 3.935               | 0.0019        | 0.875                  | 0.5568        |
| 03.02~03.03                                                          | 19%        | 1.1            | 0.5144        | -0.099        | 0.0328          | -1.265        | 0.2067        | -0.089           | 0.1115        | -0.099              | 0.2279        | -2.884              | 0.0301        | 1.487                  | 0.3385        |
| <b>04.01~04.02</b>                                                   | <b>19%</b> | <b>1.1</b>     | <b>0.3749</b> | <b>0.193</b>  | <b>1.55E-05</b> | <b>-1.465</b> | <b>0.1295</b> | <b>0.140</b>     | <b>0.0100</b> | <b>0.247</b>        | <b>0.0015</b> | <b>-1.207</b>       | <b>0.3498</b> | <b>-2.178</b>          | <b>0.1417</b> |
| 05.03~03.01                                                          | 13%        | 0.6            | 0.0012        | -0.079        | 0.1432          | 0.155         | 0.8936        | -0.149           | 0.0383        | -0.010              | 0.8998        | 1.808               | 0.2934        | -1.329                 | 0.3914        |
| 05.05~03.01                                                          | 7%         | 1.5            | 0.0712        | 0.083         | 0.2417          | -0.564        | 0.7110        | 0.074            | 0.3566        | 0.139               | 0.3067        | -2.186              | 0.2533        | 2.658                  | 0.3062        |
| <b>Conditional Model*</b><br>rs3135348 conditioned<br>on 04:01~04:02 |            |                |               | -0.240        | 1.40E-05        |               |               |                  |               |                     |               |                     |               |                        |               |

\* The test for association for rs3135348 was conducted including the haplotype in the model as a covariate to test specifically for residual effect at rs3135348 once the haplotype was accounted for.

**Supplementary Table 8:** Replication of the Chr 19 association for lung function in ProAR, SCAALA, COMPASS and Shrine et al.

| SNP Info |             | REF/<br>ALT | GASP  |          | ProAR N=1065 |        | SCAALA N=947 |               | COMPASS N=571 |        | Shirine<br>(PMID:30804560)<br>N~350K |        |
|----------|-------------|-------------|-------|----------|--------------|--------|--------------|---------------|---------------|--------|--------------------------------------|--------|
| hg19     | rsID        |             | Beta  | P        | Beta         | P      | Beta         | P             | Beta          | P      | Beta                                 | P      |
| 56085656 | rs4335869   | T/A         | 5.489 | 1.33E-10 | 7.594        | 0.2402 | 1.083        | 0.0996        | -0.452        | 0.6227 | NA                                   | NA     |
| 56086758 |             | GA/<br>GAA  | 5.433 | 1.43E-10 | NA           | NA     | <b>1.347</b> | <b>0.0179</b> | NA            | NA     | NA                                   | NA     |
| 56087272 | rs28699417  | T/C         | 5.279 | 2.54E-10 | 8.721        | 0.1341 | <b>1.363</b> | <b>0.0163</b> | 0.940         | 0.2563 | 0.420                                | 0.0945 |
| 56087281 | rs28379489  | T/A         | 5.276 | 2.65E-10 | 8.721        | 0.1341 | <b>1.363</b> | <b>0.0163</b> | 0.940         | 0.2563 | 0.420                                | 0.0951 |
| 56088110 |             | C/CA        | 6.372 | 5.19E-09 | NA           | NA     | 0.874        | 0.1418        | NA            | NA     | NA                                   | NA     |
| 56088487 | rs12972695  | A/G         | 5.144 | 4.73E-10 | 1.109        | 0.8419 | 1.029        | 0.0595        | 1.056         | 0.2009 | 0.390                                | 0.1210 |
| 56089947 | rs10403008  | C/G         | 5.211 | 3.39E-10 | 6.24         | 0.3195 | <b>1.642</b> | <b>0.0086</b> | -0.481        | 0.5926 | 0.020                                | 0.9570 |
| 56090076 | rs34164618  | G/T         | 5.271 | 2.44E-10 | 7.934        | 0.2172 | <b>1.317</b> | <b>0.0429</b> | -0.649        | 0.4751 | 0.040                                | 0.8863 |
| 56105932 | rs12609355  | G/A         | 5.195 | 1.14E-09 | 3.595        | 0.6281 | <b>2.028</b> | <b>0.0055</b> | -1.187        | 0.2401 | NA                                   | NA     |
| 56110700 | rs3803890   | G/A         | 5.369 | 8.98E-10 | -6.634       | 0.5513 | <b>2.442</b> | <b>0.0124</b> | -1.294        | 0.2219 | -0.200                               | 0.5570 |
| 56122538 | rs4410198   | G/A         | 5.83  | 5.54E-11 | -5.444       | 0.6089 | 0.230        | 0.8058        | NA            | NA     | -0.310                               | 0.3600 |
| 56127441 | rs146619376 | C/G         | 5.351 | 2.51E-09 | -38.43       | 0.0633 | -0.296       | 0.8584        | -1.275        | 0.3386 | 0.090                                | 0.8975 |
